1 **Structured sampling of olfactory input by the fly mushroom body**

2 Zhihao Zheng<sup>1,2,3</sup>, Feng Li<sup>2</sup>, Corey Fisher<sup>2</sup>, Iqbal J. Ali<sup>2</sup>, Nadiya Sharifi<sup>2</sup>, Steven Calle-Schuler<sup>2</sup>,  
3 Joseph Hsu<sup>2</sup>, Najla Masoodpanah<sup>2</sup>, Lucia Kmecova<sup>2</sup>, Tom Kazimiers<sup>2</sup>, Eric Perlman<sup>2,4</sup>, Matthew  
4 Nichols<sup>2</sup>, Peter H. Li<sup>5</sup>, Viren Jain<sup>5</sup>, Davi D. Bock<sup>2,6,\*</sup>

5 <sup>1</sup>Princeton Neuroscience Institute, Princeton, New Jersey 08544, USA

6 <sup>2</sup>Howard Hughes Medical Institute Janelia Research Campus, 19700 Helix Drive, Ashburn,  
7 Virginia 20147, USA

8 <sup>3</sup>The Solomon H. Snyder Department of Neuroscience, The Johns Hopkins University,  
9 Baltimore, MD, USA

10 <sup>4</sup>Yikes LLC, Baltimore, MD, USA

11 <sup>5</sup>Google Research, Mountain View, CA, USA

12 <sup>6</sup>Department of Neurological Sciences, University of Vermont, Burlington, VT, USA

13 \*To whom correspondence should be addressed.

14

15 *Abstract*

16 Associative memory formation and recall in the adult fruit fly *Drosophila melanogaster* is  
17 subserved by the mushroom body (MB). Upon arrival in the MB, sensory information undergoes  
18 a profound transformation. Olfactory projection neurons (PNs), the main MB input, exhibit  
19 broadly tuned, sustained, and stereotyped responses to odorants; in contrast, their postsynaptic  
20 targets in the MB, the Kenyon cells (KCs), are nonstereotyped, narrowly tuned, and only briefly  
21 responsive to odorants. Theory and experiment have suggested that this transformation is  
22 implemented by random connectivity between KCs and PNs. However, this hypothesis has been  
23 challenging to test, given the difficulty of mapping synaptic connections between large numbers  
24 of neurons to achieve a unified view of neuronal network structure. Here we used a recent  
25 whole-brain electron microscopy (EM) volume of the adult fruit fly to map large numbers of PN-  
26 to-KC connections at synaptic resolution. Comparison of the observed connectome to precisely  
27 defined null models revealed unexpected network structure, in which a subset of food-responsive

28 PN types converge on individual downstream KCs more frequently than expected. The  
29 connectivity bias is consistent with the neurogeometry: axons of the overconvergent PNs tend to  
30 arborize near one another in the MB main calyx, making local KC dendrites more likely to  
31 receive input from those types. Computational modeling of the observed PN-to-KC network  
32 showed that input from the overconvergent PN types is better discriminated than input from  
33 other types. These results suggest an 'associative fovea' for olfaction, in that the MB is wired to  
34 better discriminate more frequently occurring and ethologically relevant combinations of food-  
35 related odors.

36

### 37 *Introduction*

38 The cellular basis for associative memory formation and recall remains a central mystery of  
39 neurobiology. Connectomics, in which synaptic connections are traced between large numbers of  
40 neurons to map circuit wiring diagrams (Lichtman and Sanes, 2008), offers a new method by  
41 which to explore the topic. Given the current capabilities of electron microscopy (EM)-based  
42 connectomics technologies (Kornfeld and Denk, 2018), the adult fruit fly *Drosophila*  
43 *melanogaster* is arguably an ideal model system for investigating the neuronal networks  
44 underpinning learning and memory. Its brain is small enough to have been completely imaged at  
45 synaptic resolution by electron microscopy (Zheng et al., 2018); it is behaviorally sophisticated  
46 (DasGupta et al., 2014; Dickinson and Muijres, 2016; Ofstad et al., 2011; Oswald and Waddell,  
47 2015); and the stereotyped morphology and physiology of its cell types allow ready integration  
48 of information across individuals (Costa et al., 2016; Nern et al., 2015). Each cell type normally  
49 consists of one or a handful of neurons (Aso et al., 2014; Meinertzhagen, 2010; Scheffer et al.,  
50 2020), which may be individually addressed using genetic tools, allowing circuits to be

51 functionally imaged and perturbed in a highly specific fashion (Dana et al., 2016; Dionne et al.,  
52 2018; Klapoetke et al., 2014; Venken et al., 2011).

53 The exception to this norm is the mushroom body (MB; Figure 1A), a bilaterally symmetric  
54 structure for associative memory formation and recall (Groschner and Miesenbock, 2019;  
55 Guven-Ozkan and Davis, 2014; Heisenberg, 2003). The MB contains about 2,200 intrinsic  
56 neurons, called Kenyon cells (KCs), on each side of the fly brain (Aso et al., 2009; Bates et al.,  
57 2020; Technau and Heisenberg, 1982). Kenyon cells can be divided into three main subtypes,  $\gamma$ ,  
58  $\alpha'/\beta'$ ,  $\alpha/\beta$  (Crittenden et al., 1998; Lee et al., 1999; Tanaka et al., 2008), and the axons of each  
59 subtype project to the eponymous lobe where the KCs provide input to a relatively small number  
60 of MB output neurons (21 cell types comprising 34 neurons, Aso et al., 2014; Aso and Rubin,  
61 2020). Sensory afferents to KCs are dominated by ~150 olfactory projection neurons (PNs),  
62 which relay information from the 51 olfactory glomeruli of the antennal lobe (AL; Bates et al.,  
63 2020; Jefferis et al., 2007; Stocker et al., 1990; Wong et al., 2002). Projection neuron  
64 morphology and odorant response profiles are highly stereotyped across individuals, and exhibit  
65 broad tuning and sustained responses to panels of odorants (Bhandawat et al., 2007; Costa et al.,  
66 2016). Olfactory PNs project to the rear of the brain and collateralize in the MB main calyx,  
67 providing input to KC dendrites. Each KC dendrite terminates in specialized 'claws', each of  
68 which ensheathes a single PN axonal bouton (Figure 1B). Multiple KC claws commonly  
69 ensheath a given PN bouton, and each KC samples input from an average of ~6-8 PNs (Butcher  
70 et al., 2012; Caron et al., 2013; Leiss et al., 2009; Yasuyama et al., 2002). Multiple input PNs  
71 must be coactive in order to evoke an action potential in a given KC (Gruntman and Turner,  
72 2013), and widefield feedback inhibition is preponderant throughout the MB (Lin et al., 2014),

73 resulting in KC activity that is much sparser and more sharply tuned than PNs (Turner et al.,  
74 2008).

75 The PN-to-KC layer therefore implements a transformation of olfactory representation: broad,  
76 stereotyped, and sustained olfactory responses, in a small population of PNs, are converted to  
77 sparse, variable, and transient responses, distributed across a large population of KCs. This  
78 circuit architecture is an example of a ‘Marr motif’ (Litwin-Kumar et al., 2017; Stevens, 2015),  
79 after the theorist David Marr’s foundational work on cerebellar function (Albus, 1971; Marr,  
80 1969). The Marr motif is found in brain regions from different animal species, including  
81 cerebellum, hippocampus, and piriform cortex in vertebrates, and even the vertical lobe of the  
82 octopus (Cayco-Gajic and Silver, 2019; Farris, 2011; Shomrat et al., 2015; Stevens, 2015). In the  
83 fly, it is thought to permit efficient representation of arbitrary combinations of odorants – which  
84 may be thought of as points in a high-dimensional olfactory space – for downstream use as a  
85 conditioned stimulus during associative memory formation and recall (Cayco-Gajic and Silver,  
86 2019; Groschner and Miesenbock, 2019; Perisse et al., 2013). Theoretical analyses have argued  
87 that randomly mixing different input channels, when combined with a nonlinearity such as a  
88 spike threshold, increases the dimensionality, and, therefore, the linear separability of activity  
89 patterns, making them easier to discriminate (Babadi and Sompolinsky, 2014; Barak et al., 2013;  
90 Hansel and van Vreeswijk, 2012; Rigotti et al., 2013). Most models of the PN-to-KC network in  
91 the fly have therefore assumed that in the Marr motif, input neurons (PNs) connect to the  
92 intrinsic neurons (KCs) at random (Dasgupta et al., 2017; Eichler et al., 2017; Litwin-Kumar et  
93 al., 2017; Stevens, 2015; but see Koulakov et al., 2011; Pehlevan et al., 2017).

94 Several substantial efforts to test the hypothesis of random PN-to-KC connectivity have been  
95 made. In the fruit fly larva, a complete PN-to-KC connectome was mapped using a whole-CNS

96 electron microscopy (EM) volume (Eichler et al., 2017). No evidence of network structure was  
97 found, although single claw KCs were found to occur more frequently than a gaussian  
98 distribution would predict. However, the larval MB is qualitatively and quantitatively different  
99 from that of the adult, in that it contains only about 100 KCs per hemisphere (all of which are of  
100 a single class  $\gamma$ ; Lee et al., 1999). In adult flies, single-cell retrograde labeling was used to  
101 identify the PN inputs to a single KC in each of 200 individual flies (Caron et al., 2013). About  
102 half the claws for each KC were successfully labeled. No evidence of network structure was  
103 found, although some PN types clearly had more downstream targets than others. Finally,  
104 electrophysiological recordings of 23 KCs across 27 adult fruit flies revealed highly diverse  
105 olfactory responses, with only two KCs exhibiting an identical response profile across  
106 individuals (Murthy et al., 2008). Overall, the relatively small sample sizes of the adult datasets  
107 have sufficed to exclude highly structured PN-to-KC connectivity graphs, but have not proved  
108 randomness.

109 Indeed, several studies have hinted at the existence of PN-to-KC network structure.

110 Anatomically, PN axonal arbors and KC dendritic arbors are known to occupy stereotyped  
111 positions within the MB calyx as a function of cellular subtype (Jefferis et al., 2007; Lin et al.,  
112 2007; Tanaka et al., 2004; Zheng et al., 2018). Physiologically, calcium imaging has revealed  
113 that KC claws show more correlated responses than would be predicted by chance, and  
114 simultaneous optogenetic stimulation of three PN subtypes (comprising ~13 PNs in total) also  
115 showed greater-than-chance convergence (Gruntman and Turner, 2013).

116 Whether the PN-to-KC network is fully random, or has some structure, therefore is an open  
117 question. To address it we surveyed a large number of PN-to-KC connections, using the  
118 previously described Female Adult Fly Brain (“FAFB”) EM volume (Zheng et al., 2018). The

119 resulting sample of this Marr motif had far greater statistical power than previously obtained  
120 datasets, allowing previously undetected network structure to be revealed.

121

## 122 *Results*

123 To map the PN-to-KC network, KCs were randomly selected for reconstruction from a cross-  
124 section of the MB pedunculus, a tract where KC axons converge after their dendrites receive  
125 input in the MB main calyx (Figure 1A-B; Supplemental Figure 1A-C). The PN bouton  
126 innervating each KC claw was then retrogradely traced to the main PN axon trunk, and the PN  
127 type was identified, using previously published classifications of PNs in the FAFB dataset  
128 (Zheng et al., 2018). Initially, reconstructions were traced purely manually; later reconstructions  
129 leveraged an automated segmentation of the full FAFB dataset (Li et al., 2019). All olfactory PN  
130 input to 7,102 claws arising from 1,356 KCs was mapped and identified (~62% of all claws on  
131 the right side of the brain; 440 KCs were manually traced, and 916 were reconstructed using  
132 automated segmentation). Consistent with previous studies (Butcher et al., 2012; Caron et al.,  
133 2013), each reconstructed KC was found to have 5.2 claws on average (Supplemental Figure  
134 2A). The number of KCs postsynaptic to each PN subtype was also in excellent agreement with  
135 counts obtained from a recently released connectome of adult fly brain connectivity  
136 (Supplemental Figure 2B-C; Scheffer et al., 2020). The consistency of these metrics across  
137 datasets and methods indicates that the PN-to-KC network reconstructed in the present study is  
138 of high quality and therefore suitable for detailed analysis.

139 If PN-to-KC connectivity were random, the probability that a KC receives input from one PN  
140 type is, by definition, independent from whether it gets input from any other type. To test  
141 whether these input probabilities are in fact independent, several null models were tested. In the

142 first, the "random bouton" model, a large number of randomized PN-to-KC maps were  
143 generated, wherein each claw of each reconstructed KC was assigned a PN bouton selected (with  
144 replacement) at random. For each KC, the expected distribution of the number of inputs from  
145 each PN type in the random bouton model was obtained. Then, a conditional input analysis was  
146 performed, to determine whether KCs are more or less likely than expected to get input from a  
147 particular PN type (Figure 1C, matrix columns), given input from another PN type (Figure 1C,  
148 matrix rows). Conditional probabilities were quantified as z-scores (the number of standard  
149 deviations of the observed value from the mean of the null distribution).

150 Unsupervised clustering of conditional input probabilities revealed a distinctive 'community' of  
151 PN types which converge onto KCs at above-chance levels (Figure 1D, PN types in bold). The  
152 mean community z score was significantly higher (Supplemental Figure 3A;  $5.7 \pm 2.9$ ) than non-  
153 community PN combinations (Supplemental Figure 3C;  $-0.5 \pm 1.5$ ; Supplemental Figure 3A vs.  
154 3C,  $p < 1 \times 10^{-8}$ ). Additional PN combinations also showed elevated z-scores, but mean z-score  
155 for these was significantly lower than the selected subset comprising the community  
156 (Supplemental Figure 3B;  $2.3 \pm 1.9$ ; Supplemental Figure 3A vs. 3B,  $p < 1 \times 10^{-8}$ ). Analysis of  
157 individual randomized maps of PN-to-KC connectivity revealed no such clustering  
158 (Supplemental Figure 3E). Similar results were obtained using covariance analysis  
159 (Supplemental Figure 4).

160 Following identification of the overconvergent PN community, a literature review was conducted  
161 to determine the broad categories of odorants each PN type responds to. Strikingly, all PN types  
162 within the community were found to respond preferentially to food-related odorants (Figure 1D;  
163 Badel et al., 2016; Hallem and Carlson, 2006; Laissue and Vosshall, 2008; Mansourian and  
164 Stensmyr, 2015; Root et al., 2007; Schubert et al., 2014; Semmelhack and Wang, 2009),

165 suggesting that the observed PN-to-KC network structure might play a distinctive role in MB  
166 circuit function. Although the MB main calyx contains a great deal of recurrent circuitry  
167 (Butcher et al., 2012; Christiansen et al., 2011), with some cell types that are as yet little  
168 understood (Zheng et al., 2018), a simplifying feed-forward model of the PN-to-KC network has  
169 previously been used to study its performance on classification tasks (Eichler et al., 2017;  
170 Litwin-Kumar et al., 2017). When this model was modified to incorporate the observed PN-to-  
171 KC network structure, increased activation of community PNs was found to improve  
172 classification performance (Figure 1E-F; Supplemental Figure 5). Increased activation of all  
173 food-preferring PNs, which includes PN types in addition to the overconvergent community PNs,  
174 also led to superior classification performance (Supplemental Figure 5A).

175 To determine how over-convergence by community PNs is generated, the underlying neuronal  
176 network anatomy was further analyzed. Community PN boutons are ensheathed by many more  
177 KC claws than expected from the random bouton model (Figure 2A-B). Conversely, fewer KCs  
178 than predicted by the random bouton model receive input from the community PN types (Figure  
179 2C). This suggested that the observed network structure might result simply from more  
180 ensheathment of community PN boutons by KC claws. To test this hypothesis, a second null  
181 model was devised, in which each bouton selects a claw at random (without replacement), and  
182 the number of claws ensheathing each bouton is held equal to the observed value. In this  
183 “random claw” model, both the number of inputs to each KC and the number of outputs from  
184 each PN type are held constant. Clustering of z-scores of the observed PN-to-KC connectivity  
185 using the random claw null model revealed the same group of community PNs, albeit with lower  
186 variance (Figure 2D; Supplemental Figure 6A-B). Although the random claw model captured



187 more of the observed network structure, over-sampling of the community PNs by KCs (Figure  
188 2A) alone is therefore insufficient to explain the community cluster.

189 In contrast, application of these analysis methods to an earlier sampling of PN-to-KC  
190 connectivity (Caron et al., 2013) failed to reveal the community of overconvergent PNs  
191 (Supplemental Figure 7A-C). However, that study mapped many fewer PN-to-KC connections  
192 (about half the claws in each of 200 KCs; 1 KC mapped per fly). When the data generated in the  
193 present study were randomly sub-sampled to match this lower number, minimal network  
194 structure was detected and the community could not be discerned (Supplemental Figure 7D). The  
195 sample size of the earlier study was therefore likely insufficient to detect the network structure  
196 described here.

197 Both the random bouton and the random claw null models assume that the probability of a PN-  
198 to-KC connection is independent of its location in the MB main calyx. However, both PN and  
199 KC neuronal arbors are known to occupy stereotyped and circumscribed positions within the  
200 calyx as a function of cell type (Jefferis et al., 2007; Lin et al., 2007; Tanaka et al., 2004; Zheng  
201 et al., 2018). This suggested that cell type-specific neurogeometry might contribute to the  
202 observed nonrandom network structure. Therefore a “local random bouton” null model was  
203 constructed, in which each KC claw selects an input at random from the five nearest boutons to it  
204 within the MB main calyx (Figure 3A).

205 The local random bouton model was superior to the prior models, which lacked spatial  
206 constraints. In contrast to the random bouton model, it successfully recapitulated the greater  
207 number of claws ensheathing community PN boutons (Figure 3B). It also better recapitulated the  
208 overconvergence of community PNs onto KCs. In particular, in the observed PN-to-KC network,  
209 some KCs received 3-7 claws of input from community PNs, far more than predicted by chance

210 (Figure 3C, observed vs. random bouton models). Although the random claw model was  
211 constrained to preserve the out-degree of each PN type, it was less successful than the local  
212 random bouton model in reproducing the observed distribution of multi-claw convergent inputs  
213 from the PN community (Figure 3C, random claw vs. local random bouton models). When  
214 individual instances of the local random bouton model were compared to the random bouton  
215 model, z-score clustering largely recapitulated the observed PN community (Figure 3D); and z-  
216 score clustering following comparison of the observed PN-to-KC network to the local random  
217 bouton model failed to reveal the PN community (Figure 3E-F).

218 The success of the local random bouton model suggested that much of the observed non-random  
219 network structure arises from the specific neurogeometry of PNs and KCs. Direct visual  
220 examination of the community PN axonal arbors and postsynaptic KC dendrites bore out this  
221 interpretation. Community PN axons were tightly clustered in peripheral regions of the MB main  
222 calyx (Figure 4A-B), and the KCs with the most community input showed dendritic arbors  
223 localized to four clusters corresponding to these axonal territories (Figure 4C-E). The four  
224 clusters of KC dendrites are consistent with four MB neuroblasts (Ito et al., 1997; Lee et al.,  
225 1999). Complete reconstruction of an arbitrarily selected bundle of KCs fasciculating tightly in  
226 the MB pedunculus (Supplemental Figure 8) also showed regional bias toward the dorsolateral  
227 quadrant of the MB main calyx (Figure 4F), where collaterals of the community PNs tended to  
228 ramify. Quantification of pairwise inter-bouton distances revealed that community PN boutons  
229 were significantly closer to one another than non-community PNs (Figure 4G). Finally,  
230 unsupervised hierarchical clustering divided the PN boutons into 4 distinct territories; one of  
231 these clusters was made up of nearly all (9 of 10) of the community PN subtypes (Figure 4F).  
232 Thus the community of super-convergent PN subtypes seems to be generated by neurogeometry,

233 as revealed by visual inspection and quantitative analysis of the relevant neuronal arbor  
234 structures.

235

## 236 *Discussion*

237 Our results show that the PN-to-KC network in the adult fruit fly has non-random structure. A  
238 community of food-responsive PN subtypes converges at above-chance levels onto downstream  
239 KCs (Figure 1D). This network structure is set up anatomically: the axons of participating PN  
240 subtypes arborize in restricted regions of the MB main calyx, and the dendrites of many  
241 postsynaptic KCs are similarly restricted to those regions (Figure 4). The community PN axonal  
242 arbor territories are similar to those obtained in earlier studies based on light microscopy data  
243 (c.f. cluster 1 in Figure 4 C&D Jefferis et al., 2007; Seki et al., 2017; c.f. green cluster in Figure  
244 2 C,E Tanaka et al., 2004). This suggests that the observed PN-to-KC network structure is  
245 stereotyped across individuals. The developmental precision required to achieve this structure  
246 seems within reach of the fly nervous system, given the highly reproducible geometries of most  
247 cell types in the fly brain, including those innervating the MB main calyx (Aso et al., 2014; Lin  
248 et al., 2007; Zheng et al., 2018). The PN community we observe in MB is also nearly identical to  
249 an independently discovered food-related PN subnetwork formed by axo-axonic synapses  
250 between PNs in the lateral horn (c.f. Figure 3F in Bates et al., 2020), suggesting that clustered  
251 connectivity of this subset of food-responsive PN types is conserved between brain areas  
252 subserving innate (lateral horn) and learned (MB) behavior in the fly.

253 Why was this structured network connectivity not been seen previously? The likeliest answer  
254 may be that past efforts lacked sufficient statistical power to detect the PN community.

255 Subsampling of current dataset to match the number of samples of the most thorough of previous  
256 efforts (Caron et al., 2013) renders the community of food-responsive PNs undetectable  
257 (Supplemental Figure 7). Differences in results may also be due to the sampling methods used,  
258 but until statistical power is sufficient across all methods, it will be challenging to resolve this  
259 question. Furthermore, although our effort is the largest to date, additional network structure may  
260 be detected if and when the PN-to-KC network is mapped to completion ipsilaterally and  
261 contralaterally in the FAFB dataset. Forthcoming additional brain-spanning EM volumes of the  
262 adult fly will also be of interest in this regard (e.g. Scheffer et al., 2020). Alternative analysis  
263 methods (e.g. Athreya et al., 2017; Jonas and Kording, 2015; Sporns and Betzel, 2016) might  
264 also reveal additional networks structure. It will be of interest to learn whether this community  
265 is consistent across individuals, and whether it varies as a function of genetic background,  
266 neuronal activity levels, and environmental conditions during development (Kremer et al., 2010;  
267 Sugie et al., 2018). Even if the observed network structure is conserved across individuals, it is  
268 likely that synaptic output from food-responsive KCs is variable, given that MBON odorant  
269 responses are highly variable across individuals (Hige et al., 2015).

270 What is the functional role of the observed network structure in MB circuit operation?

271 Simplifying models have shown that random connectivity in the PN-to-KC network increases  
272 dimensionality and linear separability of neural representation (Litwin-Kumar et al., 2017;  
273 Stevens, 2015), indicating that randomly connected Marr motifs may support optimal stimulus  
274 classification. However, this assumes that all PNs are activated in a statistically identical fashion.  
275 A version of this model incorporating the observed over-convergence of food-responsive PNs  
276 onto KCs showed increased discrimination performance for PNs responding to food-related  
277 odorants, and decreased performance for the other PN types (Figure 5). This tradeoff calls to

278 mind the efficient coding hypothesis, which states that neuronal resources are allocated to match  
279 the distribution of natural stimuli, such that more frequently encountered stimuli are sampled  
280 more densely (Barlow, 2012; Laughlin, 1981). In a normal fly's life, food-related odorant  
281 combinations are presumably encountered more frequently than combinations of arbitrary  
282 odorants (Mansourian and Stensmyr, 2015). The efficient coding hypothesis predicts that these  
283 more frequently encountered combinations of food-related odorants would be sampled more  
284 densely than combinations of arbitrary odorants; and indeed, this is what we observe in the  
285 *Drosophila* Marr motif. Conceptually, this may be thought of as a kind of 'associational fovea',  
286 in which more frequently encountered, ethologically relevant combinations of stimuli are  
287 sampled more densely (Supplemental Figure 9).

288 Given the complexity of MB dynamics during learning and recall (Felsenberg et al., 2018; Inada  
289 et al., 2017; Oswald and Waddell, 2015; Perisse et al., 2016), additional functional  
290 characterization of the MB during learning and recall will be needed to determine if the above  
291 speculation is correct. Recurrent local microcircuitry is abundant in the MB, including KC-KC  
292 synapses (Eichler et al., 2017; Leitch and Laurent, 1996; Liu et al., 2016; Schürmann, 1974), PN-  
293 PN synapses (Bates et al., 2020), KC-to-PN synapses (Zheng et al., 2018), and extensive  
294 connectivity with local and extrinsic neurons (Amin et al., 2020; Butcher et al., 2012;  
295 Christiansen et al., 2011; Inada et al., 2017; Lin et al., 2014; Liu and Davis, 2009). It is also  
296 unknown whether the cell types involved fire exclusively in all-or-none fashion, or whether  
297 synaptic release can be evoked locally (Zhang et al., 2019). This question becomes especially  
298 pertinent given the near ubiquity of mixed input/output neurites in the fly brain (with the  
299 exception of the finest dendritic processes) are nearly ubiquitous in the fly brain (Bates et al.,  
300 2020; Meinertzhagen, 2018; Olsen and Wilson, 2008; Takemura et al., 2017; our unpublished

301 observations). Downstream of the PN community, different KC subtypes may also play different  
302 roles, an aspect not investigated in the present study. Given these complexities, it may be that  
303 richer models will be required to fully describe the effect of the observed network structure  
304 (Litwin-Kumar and Turaga, 2019).

305 The present work joins other studies in which unexpected structure is detected in neuronal  
306 networks through quantitative comparison of observed connectivity to null models of  
307 neurogeometry (e.g. Bopp et al., 2014; Brown and Hestrin, 2009; Egger et al., 2014; Kasthuri et  
308 al., 2015; Lee et al., 2016; Mishchenko et al., 2010). Because connectomics data sets offer the  
309 exact positions of all synaptic input and output sites on axonal and dendritic arbors, they provide  
310 the opportunity to construct unusually well constrained geometric null models. For many classes  
311 of neuronal circuit, connectomics data sets may therefore improve the discoverability of network  
312 structure compared to alternative methods. This strength among others illustrates how, although  
313 connectomics-style wiring diagrams are by themselves clearly insufficient to explain neuronal  
314 circuit function (Bargmann and Marder, 2013), they are a useful scaffolding for integrating data  
315 across modalities and generating experimentally testable predictions.

316

## 317 *Methods*

### 318 **Neuron tracing**

319 Neurons were reconstructed from the whole brain EM dataset of an adult fly (Zheng et  
320 al., 2018). Skeleton tracing of neuronal arbors and criteria of synapse annotations are conducted  
321 as described previously (Zheng et al., 2018) with the CATMAID tracing environment  
322 (Schneider-Mizell et al., 2016). To briefly summarize, all the manually traced neurons were  
323 reconstructed with an iterative tracing method by at least two tracers, an initial tracer and a

324 subsequent proofreader. The initial tracer reconstructed arbors, followed by systematic review by  
325 a different proofreader. When either tracer was not confident about the identifications of a neural  
326 process or synapses, they cooperatively examined the image data to reach a consensus. All such  
327 sites were further reviewed and resolved by an expert tracer. A chemical synapse was identified  
328 if it met at least three of the four following features, with the first as an absolute requirement: 1)  
329 an active zone with vesicles; 2) presynaptic specializations such as a ribbon or T-bar with or  
330 without a platform; 3) synaptic clefts; and 4) postsynaptic membrane specializations such as  
331 postsynaptic densities (PSDs).

332 Our tracing approach is biased to errors of omission rather than commission. This approach  
333 has been shown to have minimal impact on network connectivity in the fly larva (Schneider-  
334 Mizell et al., 2016). In addition, the present study is focused on the connectivity between PNs  
335 and KCs at a distinctive structure called the microglomerulus, which contains a multitude of  
336 synapses between a given PN bouton and its postsynaptic KC claws (Butcher et al., 2012; Leiss  
337 et al., 2009; Yasuyama et al., 2002). It is therefore unlikely that the loss of any particular synapse  
338 during reconstruction qualitatively affected the analysis described here.

339 As in Zheng et al. (2018), two reconstruction strategies were used: tracing to  
340 classification and tracing to completion. In tracing to classification, in general only backbones  
341 and not twigs (microtubule-containing, large diameter neurites, and microtubule-free, fine  
342 neurites, respectively; Schneider-Mizell et al., 2016) are reconstructed. Tracing is halted once the  
343 reconstructed neuronal morphology unambiguously recapitulates that observed by LM or  
344 previous EM reconstruction studies for a given cell class. In tracing to completion, all of a given  
345 neurite is reconstructed, along with all of its input and output synapses, unless ambiguities in the  
346 data make tracing impossible. In some cases tracing to completion is done only within a given

347 brain compartment; in the present study, for example, manually reconstructed KCs were traced  
348 to completion only within the MB main calyx (see below).

349

### 350 **Random sampling of KCs**

351 Kenyon cells were randomly sampled from within MB pedunculus ("Random Draw  
352 KCs") on the right side of the brain. The pedunculus is a tract of fasciculated KC axons  
353 projecting from the posterior of the brain, where KC dendrites ramify in the the MB calyx, to the  
354 lobes of the MB at the anterior of the brain, where synapses are made between KCs, MBONs and  
355 DANs (Technau and Heisenberg, 1982; Figure 1A). All neuronal processes in a transverse plane  
356 of pedunculus (section #4186 in the FAFB dataset) were labelled with seed nodes (2740 in total;  
357 Supplemental Figure 1). Seed nodes were randomly selected for reconstruction, which proceeded  
358 posteriorly (i.e. retrogradely, in the case of KCs) from the seed node plane. In addition to KCs,  
359 the anterior paired lateral (APL) neuron (a wide-field inhibitory neuron; Liu and Davis, 2009),  
360 and MB-CP1 (an MBON; Tanaka et al., 2008), were known to have neurites in the pedunculus  
361 (Zheng et al., 2018). Therefore tracing to classification was done to determine whether the  
362 neuron arising from a given seed node was a KC, using the following morphological criteria.  
363 Kenyon cell somata are posterior and slightly dorsal to the MB calyx; each KC makes a handful  
364 of dendritic specializations called "claws" within the calyx; and has a single axon projecting  
365 anteriorly, with few branches, in the pedunculus (Aso et al., 2014). The APL neuron (one within  
366 the MB on each side of the brain) has numerous, densely branching and fine neurites ramifying  
367 throughout the entire MB. The MB-CP1 neuron similarly branches densely in the pedunculus  
368 and calyx. Disambiguating between these neuron types was therefore relatively straightforward,  
369 and tracing was halted if the neuron arising from a seed node was determined not to be a KC.



370 The Random Draw KCs were reconstructed either manually (440 KCs) or by an automatic  
371 segmentation-assisted approach (916 KCs), described below. The total sample size of 1,356 KCs  
372 was constrained by the time and resources available for the effort; the overall goal was to obtain  
373 as large a sample as possible to maximize statistical power.

374

### 375 **Manual tracing of KCs**

376 Each manually reconstructed KC was retrogradely traced to completion from at least  
377 section 4186 of the FAFB dataset to the posterior of the brain (some were traced to a greater  
378 extent). This spans the posterior  $\sim 1/3$  of pedunculus and the entire MB calyx. In previous work  
379 (Zheng et al., 2018), the boutons of all PNs in calyx as well as the glomerular subtypes of all PNs  
380 were identified. Typically, each dendritic claw received input from a single bouton (Leiss et al.,  
381 2009; Yasuyama et al., 2002). To facilitate downstream analysis (see below), “claw border” tags  
382 were applied to each KC at a node between the “arm” and distal fingers of each KC claw. The  
383 “claw border” tags therefore delineated KC claws post-synaptic to distinct PN boutons.  
384 Similarly, “bouton border” tags were applied to the PN arbors within MB main calyx.

385 The majority of reconstructed KCs received olfactory inputs from PNs within MB main  
386 calyx. There are 3 main KC classes,  $\gamma$ ,  $\alpha'/\beta'$ ,  $\alpha/\beta$ , named according to which of the eponymous  
387 lobes at the anterior MB the KC axon projects (Aso et al., 2014; Crittenden et al., 1998; Lee et  
388 al., 1999; Tanaka et al., 2008). Two additional, numerically fewer types of KC ( $\alpha/\beta_p$  and  $\gamma_d$ )  
389 receive non-olfactory inputs such as visual, gustatory, and temperature information via dendritic  
390 arbors within MB accessory calyces (Yagi et al., 2016). These were excluded from analysis. All  
391 Random Draw KCs were traced to classification anteriorly to section 4186; subtype was assigned  
392 depending on which MB lobe the KC axon ramified within.

393

### 394 **Automated segmentation-assisted tracing of KCs**

395           During the KC reconstruction effort, a segmentation of the FAFB dataset became  
396 available (Li et al., 2019). A tracing workflow using this segmentation was therefore adopted.  
397 Automated segmentation-derived skeleton fragments were manually concatenated, and the entire  
398 resulting arbor was proofread as described above. KC claws were only partially reconstructed,  
399 sufficient to define which PN bouton was contained and to identify and annotate at least 3  
400 synapses from the bouton to the claw. Control experiments in which one tracing team manually  
401 reconstructed KCs to completion and another independently used the automated segmentation to  
402 map PN-to-KC connectivity demonstrated the consistency of results between both approaches in  
403 quantifying PN bouton/KC claw connection counts (data not shown).

404

### 405 **Conditional input analysis**

406           To determine whether input to KCs from PNs was independent or conditional on PN  
407 type, a new method was devised which we termed "conditional input analysis." The result is a  
408 matrix for which a given cell indicates whether, given input from the row PN type, a KC is more  
409 or less likely than chance to get input from the column PN type. This approach also allows for  
410 detection of asymmetric conditional input (the case where e.g. KCs on average get more input  
411 from type C, given input from type A; but less input from type A, given input from type C). Each  
412 observed PN bouton-KC claw connection is treated as a single count. The observed number of  
413 counts for a given PN type is compared to the distribution of counts generated using a null  
414 model. Several null models were used in this study (see below). For each combination of PN  
415 types, a z-score is computed (i.e. how many standard deviations from the mean of the null

416 distribution the observed number of counts is). Unsupervised K-means clustering of the z-score  
417 matrix was used to group matrix entries.

418 A summary of the steps in conditional input analysis follows; source code is available at  
419 [https://github.com/bocklab/pn\\_kc](https://github.com/bocklab/pn_kc).

420 Projection neuron types are named after the glomerulus ('Glom') in the antennal lobe that  
421 PN's dendrites innervate. Consider types Glom A, B, C, and so on. For a given connectivity  
422 matrix,

423 1. Select all KCs having at least one claw receiving input from a bouton of Glom A.

424 2. The number of inputs to these KCs from Glom B, C, D, and so on are counted. This  
425 provides a count of the number of inputs to the KC cell population from Glom B-D, given input  
426 from Glom A.

427 3. Repeat (1) – (2) for Glom B, C, D, and so on.

428 4. For each null model (see below), repeat (1)-(3) above on 1,000 *in silico*  
429 randomizations of the observed PN-to-KC network. This generates the null distributions from  
430 which a z-score can be generated for observed connectivity for each PN type pair. A matrix of  
431 these z-scores is termed a “conditional input matrix”.

432 7. Apply K-means clustering to the conditional input matrix. The K-means algorithm  
433 (MacQueen, 1967) clustered PN types into groups with equal variances and the cluster number  
434 of each PN type is used to re-order both the columns and rows of the z-score matrix.

435 K-means clustering of the conditional input matrix groups glomeruli with similar z-scores  
436 together, and therefore reveals subsets of PNs that provide more (or less) input than predicted by  
437 a given null model. Over-convergence of inputs (red in our figures) is more strongly detected by  
438 this approach, since the random bouton null model (see below) can result in PN types having a

439 small number of boutons to have zero KC outputs. This, in turn, lowers the magnitude of  
440 negative z-scores (since the mean of the null model values is already low).

441

#### 442 **Null models of PN-to-KC connectivity**

443 Three null models were used: (1) random bouton model, (2) random claw model, and (3)  
444 local random bouton model.

445 In the *random bouton model*, each Random Draw KC claw is reassigned, with  
446 replacement, to a randomly selected PN bouton in the calyx. On average, therefore, the number  
447 of outputs provided by PN type (i.e. out-degree per PN type) will be proportional to the number  
448 of boutons that belong to that type. The number of claws for each KC (i.e. in-degree per KC) is  
449 also maintained. To apply conditional input analysis to the data of Caron et al. (2013) using this  
450 null model, the bouton counts per PN type obtained from the present work were used  
451 (Supplemental Figure 7), since bouton counts per PN type were not generated in that study.

452 In the *random claw model*, each PN bouton is reassigned claws at random, without  
453 replacement. The number of claws so assigned is equal to the number of claws ensheathing that  
454 bouton in the observed PN-to-KC network. Thus in this randomization, the number of claws  
455 receiving input from a given PN type (i.e. out-degree per PN type) and the number of claws each  
456 KC has (i.e. in-degree per KC) are maintained.

457 In the *local random bouton model*, each claw of each KC is randomly assigned to one of  
458 its five nearest boutons (including the one it ensheathed in the observed network), with  
459 replacement. Distances were measured between claw and bouton centroids. In this  
460 randomization, KC in-degree and geometric constraints on connectivity are preserved.

461

## 462 **Covariance analysis of connectivity**

463 Covariance analysis (Newman, 2018) is a commonly used measure of whether two inputs  
464 occur more frequently than predicted by chance and as such is an alternative to the conditional  
465 input analysis described above. Its output is a matrix of p-values of input rates compared to the  
466 expected distribution arising from given null model. The procedure is summarized as follows.

467 1. The covariance measure for each pair-wise combination of PN types was computed for  
468 the observed connectivity.

469 2. The observed PN-to-KC connectivity was randomized 1,000 times using the random  
470 bouton model. For each randomization, a covariance matrix of PN types was computed.

471 3. For each pairwise combination of PN types, a p value is estimated by counting how  
472 often the randomized covariance was great than or equal to the observed covariance. A p value  
473 of less than 0.05 (significance level) implies the probability of obtaining such a covariance in a  
474 random network is low, and the alternative hypothesis of seeing such an observed value in a null  
475 model is therefore rejected. The results are shown in a p-value matrix (Supplemental figure 4 A -  
476 D) in which each cell represents a p value for a given pair of glomeruli indicated in the  
477 corresponding row and column labels.

478 4. The p-value matrix was re-ordered either using the Fig 1D clustering order  
479 (Supplemental Figure 4 A, C) or using order given by K-means clustering (Supplemental Figure  
480 4 B, D). To cluster statistically significant but numerically small p values, K-means clustering  
481 was performed on a binary version of the p-value matrix wherein all p values less than 0.05 were  
482 set to 1, and otherwise to 0.

483 For the analysis of synaptic connectivity (Supplemental Figure 4C, D), covariance  
484 measures were directly calculated from synapse counts, using only the manually reconstructed

485 Random Draw KCs (whose dendritic arbors in MB calyx were reconstructed to completion; see  
486 Manual Tracing of KCs, above). To generate the null model of synaptic connectivity, the bouton-  
487 claw binary network is randomized and each bouton-claw connection is assigned a synapse count  
488 that was randomly drawn (with replacement) from the distribution of number of synapses per  
489 claw.

490

### 491 **Clustering analysis of PN boutons**

492 Each PN type was classified and each the bouton in MB calyx was annotated in previous  
493 work (Zheng et al., 2018). Using these annotations, skeleton reconstructions of each bouton were  
494 extracted. Pairwise NBLAST scores on the bouton skeletons were computed (Costa et al., 2016)  
495 and clustered by Ward's algorithm (Murtagh and Legendre, 2014). NBLAST is a similarity  
496 measure for both shape and position; in this case, because the skeletons within each bouton were  
497 small, clustering is likely based mostly on bouton position. The probability of bouton arbors  
498 being in a given location in calyx was estimated following the approach of Bates et al. (2020). In  
499 brief, the bouton skeletons were resampled evenly at 0.1  $\mu\text{m}$  intervals. A Gaussian kernel density  
500 estimate (KDE) was used to fit the number of skeleton nodes per unit space ( $\text{cubic } \mu\text{m}^{-1}$ ) for each  
501 of the two projected dimensions (x,y or x,z). The density map therefore reflects the probability  
502 (point density function, PDF) for boutons of a given PN type to be found at a given location in  
503 MB calyx. The PDF is normalized to the same scale ( $0 - 2.5 \times 10^{-9}$ ) for each of the four groups.  
504 The boundaries of MB calyx were generated from an nc82 (synapse)-stained template brain  
505 aligned to the FAFB image volume as described in Zheng et al. (2018).

506

### 507 **Comparison of postsynaptic KC counts between FAFB and hemibrain datasets**

508           During preparation of this manuscript, a segmentation of a portion of a second adult fly  
509 brain became available in preprint form (the 'hemibrain'; Scheffer et al., 2020). In the hemibrain  
510 dataset, all PNs and ~2,000 KCs on the right side of the brain were segmented as part of a large-  
511 scale proofreading effort (50 person-years over ~2 calendar years). As of this writing, the  
512 publicly available hemibrain segmentation does not demarcate PN bouton and KC claw  
513 boundaries, preventing straightforward application of our analysis approach. We used the  
514 hemibrainr package (<https://github.com/flyconnectome/hemibrainr>) to download the connectivity  
515 matrix between all PNs and KCs from the dataset server (hemibrain v. 1.0.1,  
516 <https://neuprint.janelia.org>). The connectivity matrix is then binarized such that each unique pair  
517 of PN and KC with 3 or more synapses is defined as one connection and otherwise zero. For a  
518 PN, the number of connections is equivalent to the number of KCs postsynaptic to the PN.  
519 Connections for different PNs of a common type are summed and divided by the total number of  
520 connections in the entire binary connectivity matrix. The percentage of connections for each PN  
521 type is used to compare to the same number from FAFB (Supplemental Figure 2B-C).

522

## 523 **Modeling**

524           The PN-to-KC network model was a modification of earlier models used in the larval and  
525 adult fly (Eichler et al., 2017; Litwin-Kumar et al., 2017, respectively). In these models,  
526 simulated activities across all PNs are created for each stimulus odor. Each stimulus is randomly  
527 associated with one of two categories with equal probability. The PN activity (signal) is  
528 generated by drawing independently from a rectified unit Gaussian distribution corrupted by  
529 Gaussian noise (s.d. 0.2). To probe the effect of the observed overconvergence of community PN  
530 types (10 types comprising 16 individual PNs), for each stimulus, 16 modeled PNs were activated

531 (i.e. Gaussian activity patterns were created). Within the 16 activated PNs, the fraction of  
532 community PNs was varied as follows: 0 (16 non-community PNs), 0.125 (2 community PNs, 14  
533 non-community PNs), 0.25 (4 community PNs, 12 non-community PNs), 0.375 (6 community  
534 PNs, 10 non-community PNs), 0.5 (8 community PNs, 8 non-community PNs), 0.625 (10  
535 community PNs, 6 non-community PNs), 0.75 (12 community PNs, 4 non-community PNs),  
536 0.875 (14 community PNs, 2 non-community PNs), 1 (all 16 community PNs). These fractional  
537 values comprise the x-axis of Figure 1F. For fractional values less than 1, activated PNs were  
538 randomly selected from the 16 community PNs. For all fractional values, non-community PNs  
539 were randomly selected from the population of 97 non-community PNs. Gaussian noise with  
540 standard deviation 0.2 was then added to the activity levels of all PNs. Kenyon cell activity is  
541 given by multiplying PN activity by the matrix of PN-to-KC connections  $m = \theta (h - \theta)$ ,  
542 where  $\theta$  is a threshold whose values are picked for each KC such that each KC is active with a  
543 probably of  $f$  ( $f = 0.05$ , also called coding level) for each stimulus. The  $\theta$  is a rectification term.  
544 The  $h$  represents input activity provided by each PNs multiplied by their corresponding number  
545 of synapses to the KC. KC activity patterns were used to train a maximum-margin classifier, and  
546 the goal is to predict the pre-assigned one of two categories. In the testing phase, the same set of  
547 PN activity patterns corrupted with different applications of Gaussian noise were used as input,  
548 and the resulting KC activity patterns were given to the trained classifier to predict which of the  
549 two categories each stimulus belongs to. Error rates of the prediction from 1,000 simulations  
550 were used to evaluate classifier performance. Because this is a two-alternative classification task,  
551 the expected error rate for chance performance is 50%. For reporting error rate results (Figure  
552 1F, Supplemental Figure 5A-B), standard errors of the mean (s.e.) are used as the goal is to  
553 compare mean error rate of different models.



554 The model requires synapse counts between each connected PN-KC cell pair. In Figure  
555 1F and Supplemental Figure 5A, the synaptic counts between PNs and manually reconstructed  
556 Random Draw KCs were used. In Supplemental Figure 5A, the same model is implemented  
557 except that 38 food PNs (Supplemental Table 1) are chosen to be activated. In the activated food-  
558 PN datum (red dot), 38 food PNs are activated with simulated Gaussian activity patterns and all  
559 PNs, including the food PNs, are corrupted with Gaussian noises (s.d. 0.2). In the null model  
560 distribution (blue histogram in Supplemental Figure 5A), for each simulation (one count in the  
561 histogram), a random set of 38 PNs are picked to be activated and error rates of the classifier are  
562 computed to evaluate performance of the models. In Supplemental Figure 5B, each KC's  
563 connections to a given PN were randomly reassigned (with replacement) to different PN, and 16  
564 PNs, with varying proportion of community PNs, are activated using the same model  
565 implementation as in Figure 1F.

566

## 567 **Statistics**

568 When comparing two or more distributions, if the data are categorical (e.g. Figure 2A,  
569 3C, Supplemental Figure 2C) a Chi-square test is used. When the data are continuous (e.g.  
570 Figure 4G, Supplemental Figure 3B-D, 6B), a Kolmogorov–Smirnov test (K-S test) is used.  
571 When a distribution is compared with a observed datum (i.e. a single data point), as in each cell  
572 of the conditional input matrices (e.g. Figure 1D, 2D, 3D-F, Supplemental Figure 3E, 6, 7A, C-  
573 D), in Figure 2B, C, 3B, and in Supplemental Figure 5A, a z-score (see Conditional input  
574 analysis, above) is computed.

575

## 576 **Figure legends**

### 577 **Figure 1**

578 (A) Schematic of olfactory pathway. Odorants bind to olfactory receptor neurons (ORNs) in the  
579 fly antennae and activate a stereotyped subset of glomeruli in the antennal lobe (AL). ORNs in a  
580 specific glomerulus provide olfactory inputs to a given class of PNs and the PNs can be  
581 classified into ~51 types based on their originating antennal lobe glomeruli. In each hemisphere  
582 of a fly brain, ~150 PNs project to two higher brain regions, MB and lateral horn (LH). In the  
583 calyx of the MB, the PNs synapse onto ~2,200 KCs. The KCs then converge onto a small  
584 number of mushroom body output neurons (MBONS, ~34) at the medial and vertical lobes of the  
585 MB. Modification of synapses between KCs and MBONS likely underlies olfactory learning and  
586 memory in the fly (Barnstedt et al., 2016; Guven-Ozkan and Davis, 2014; Heisenberg, 2003).

587 (B) Electron microscopy reconstruction of the dendrites of a KC and its olfactory input from PNs  
588 in the MB calyx. Kenyon cell dendrites terminate as claw-like elaborations; each claw receives a  
589 variable number of synapses (numbers in white) from a single ensheathed PN bouton. Each KC  
590 gives rise to a small number of claws (mean  $\pm$  s.d.,  $5.2 \pm 1.6$ ; Supplemental figure 1).

591 (C) Schematic of conditional input analysis of the PN-to-KC network. Each PN-to-KC  
592 connection is treated as binary: if a claw receives three or more synapses from a PN bouton, the  
593 KC is considered as receiving one input from that PN type; otherwise it is treated as zero. Input  
594 counts across all KCs are then compared to a randomized null model. In the example, given input  
595 from PN type 'A', KCs are more likely to receive input from PN type 'C' and less likely to receive  
596 input from PN type 'B'. A matrix is used to represent the population of these conditional input  
597 probabilities. Each row in the matrix represents the probability that, given input from the PN

598 type for that row, KCs are more (red) or less (blue) likely to get input from the PN types in the  
599 columns. Re-ordering of the matrix by K-means clustering helps illustrate these relationships.  
600 The color scale for each cell in the matrix indicates the z-score, i.e. the number of standard  
601 deviations (s.d.) between the observed number of inputs and the mean number of inputs arising  
602 from the null model.

603 (D) Structured PN-to-KC connectivity against the random bouton null model. Conditional input  
604 analysis was applied to 1,356 randomly sampled KCs on the right side of the fly brain. A specific  
605 group of PNs ('community' PNs, type names in bold) were found to provide above-chance levels  
606 of convergent input to downstream KCs. Olfactory PN types are color-coded according to the  
607 category of odorants to which they respond. All community PNs have been reported to primarily  
608 encode food-related odors (Supplemental Table 1).

609 (E) Schematic of PN-to-KC network model. In the PN input layer, an olfactory response is  
610 represented as a signaling response within a subset of PNs, mixed with Gaussian noise across all  
611 PNs. Each of these activity patterns is then assigned a positive or negative valence. Kenyon cell  
612 activity is the product of the observed PN-to-KC connectivity matrix and simulated PN activity,  
613 subject to a sparseness constraint such that only 5% of KCs are active at any time. The classifier  
614 learns to predict the pre-assigned valence based on a readout of KC activity. Performance is  
615 quantified by calculating the error rates of the classifier prediction.

616 (F) Using the observed PN-to-KC connectivity, discrimination of inputs from community PNs is  
617 superior to that of inputs from non-community PNs. Error bars are standard errors (s.e.) of the  
618 mean across 1,000 simulations. For each simulation, a randomly selected subset of PNs are  
619 activated. A larger number of activated community PNs leads to better discrimination  
620 performance.

621

622 Figure 2

623 (A) Biased sampling of PN inputs by KCs. Each bar in the x-axis represents a PN and the y-axis  
624 shows the number of claws that receive input from each PN in the random bouton null model  
625 (blue) and in the observed network (orange). PNs are grouped by type (i.e. glomerular class) and  
626 colored by behavioral significance (as in Figure 1D). Community PN types are underlined. In the  
627 observed network, community PNs are usually presynaptic to more KCs than predicted by the  
628 random bouton null model (error bars, s.d. of 1,000 random networks; Chi-square test  $p <$   
629  $1 \times 10^{-10}$ ).

630 (B) Kenyon cells over-sample inputs from community PNs. The observed number of claws  
631 receiving input from community PNs (red dot) was greater than the mean of the random bouton  
632 null model (distribution of 1,000 random networks; random bouton null model, mean  $\pm$  s.d.,  
633  $1412.5 \pm 34.0$ ; observed, 1901; z-score, 14.3).

634 (C) Community PNs provide convergent input onto postsynaptic KCs. The observed number of  
635 KCs receiving one or more inputs from community PNs (red dot) was lower than the mean of the  
636 random bouton null model (distribution from 1,000 random networks; random bouton null  
637 model: mean  $\pm$  s.d.,  $903.4 \pm 17.3$ ; observed, 844; z-score, 3.4).

638 (D) Overconvergent PN-to-KC connectivity contributes to the PN community. Conditional input  
639 analysis was applied to the observed PN-to-KC connectivity using the random claw null model,  
640 in which PN-to-KC connections are randomized while holding constant both the number of KC  
641 claws postsynaptic to each PN type and the number of input PN boutons to each KC. The PN

642 community still emerges, despite the fact that the random claw model incorporates the greater-  
643 than-chance output from community PN types (Figure 2A).

644

### 645 Figure 3

646 (A) Schematic for the local random bouton null model. Each claw of each KC is randomly  
647 assigned to one of the five nearest PN boutons. In observed PN-to-KC network (upper), one claw  
648 from the KC receives input from a PN bouton (purple). The claw is randomly assigned to a  
649 different neighboring PN bouton (green).

650 (B) The local random bouton model recapitulates the greater output of community PNs. The  
651 observed number of claws receiving inputs from community PNs (red dot) was compared to the  
652 number of claws with community inputs in the random bouton model (green histogram) and the  
653 local random bouton model (blue histogram). Each distribution represents 1,000 random  
654 networks from the null models. Observed (1901) vs. random bouton model (mean  $\pm$  s.d., 1412.5  
655  $\pm$  34.0), z-scores 14.3. N.b. the random claw null model is constrained to have the observed  
656 number of claws postsynaptic to community PNs, and therefore is not considered here.

657 (C) Individual KCs have multiple claws postsynaptic to community PNs boutons. Distributions  
658 are shown for the observed network, as well as the means of the random bouton, random claw,  
659 and local random bouton null models (error bars,  $\pm$  s.d.; observed vs. random bouton null model,  
660 Chi-square test  $p < 1 \times 10^{-10}$ ; observed vs. random claw null model, Chi-square test  $p < 1 \times 10^{-10}$ ;  
661 observed vs. local random bouton null model, Chi-square test  $p < 0.028$ ).

662 (D) The local random bouton model recapitulates some of the PN community. Conditional input  
663 analysis was applied to a representative instance of the local random bouton model, with the

664 random bouton model as the null model. The local random bouton model captures predominantly  
665 the same cluster of community PNs (except one PN class, DM5). Community PN types are in  
666 bold, and all PN types are color-coded by their response categories as in Figure 1D.

667 (E) Conditional input analysis of the observed connectivity using the local random bouton model  
668 as the null model shows no connectivity structure contributed by the community PNs. The  
669 remaining network structure is due to biased sampling of other PN types (see Figure 2A).

670 (F) The same matrix shown in (E) but with columns and rows ordered as in Figure 1D. The  
671 cluster of community PNs, as seen in Figure 1D, is not seen here, as the community PN network  
672 structure is largely recapitulated by the local random bouton null model.

673

#### 674 Figure 4

675 (A) Reconstructed PNs project from AL to two higher brain centers, MB and LH. Community  
676 PNs (green) have regionalized projection patterns in MB and LH compared to non-community  
677 PNs (white/purple).

678 (B) Frontal view of MB calyx showing reconstructed PN axon arbors; colors as in (A).

679 (C) Same as (B), with the addition of the 6 manually reconstructed KCs receiving 6 or more  
680 bouton inputs from community PNs. The dendritic arbors of these KCs (red) overlap with the  
681 community PN axon territories (green).

682 (D) Posterior view of MB calyx showing 46 reconstructed KCs that receive 5 or more inputs  
683 from community PNs. The dendrites and soma of the KCs, respectively, are segregated into 4  
684 clusters (assigned 4 arbitrary colors) that may correspond to the 4 different neuroblasts of KCs in  
685 development (Ito et al., 1997; Lee et al., 1999).

686 (E) Dorsal view of calyx shows 4 different clusters of the same set of KCs as shown and  
687 colored in (D). The cluster axonal bundles also fasciculate in the pedunculus (bottom of  
688 figure).

689 (F) Frontal view of calyx shows PN collaterals (colors as in A) and reconstructions of all KCs  
690 from a single bundle (“bundle KCs”). The bundle KC dendrites ramify in the dorsal-lateral  
691 quarter of the calyx, overlapping extensively with the community PN axonal arbor territory.

692 (G) Community PN boutons are closer to each other than non-community PN boutons. Each  
693 count represents the distance between a bouton and its nearest same-type bouton (blue:  
694 community PN bouton pairs; green: non-community PN bouton pairs; K-S test  $p < 1 \times 10^{-10}$ )

695 (H) Unsupervised clustering reveals community PN boutons are spatially colocated in the MB  
696 calyx. (upper) Hierarchical clustering based on bouton arbor NBLAST score divides the PNs into  
697 four different groups. Nine out of ten community PNs belong to the same group. The y axis of  
698 the dendrogram represents Euclidean distances and is cut at 1.5 to divide different PN subtypes  
699 into 4 clusters. (lower) Bouton density maps of the four different groups. Colors correspond to  
700 the four groups shown in the dendrogram. Color intensity represents density of bouton arbors in  
701 a unit space ( $\text{cubic } \mu\text{m}^{-1}$ ) and is based on normalized point density function (PDF, Methods).

702

### 703 Supplemental Figure 1

704 (A) Schematic of MB anatomy, as in Figure 1A. Kenyon cell axons fasciculate and project  
705 anteriorly in parallel within the pedunculus. The blue line in the pedunculus indicates the  
706 location of the transverse plane where KCs were randomly sampled for reconstruction (B - C).

707 (B) Subarea of a frontal section from the whole-brain EM volume, showing the cross-section  
708 through pedunculus (blue false color) used for random sampling (C).  
709 (C) Randomly sampled KCs in the pedunculus. The cross-section of each randomly sampled KC  
710 axon is annotated with a magenta dot. All neurite cross-sections within the pedunculus were  
711 initially annotated (not shown); if a neurite was randomly sampled for reconstruction that turned  
712 out not to be a KC, it was discarded from further analysis. N.b. a discrete region in the middle of  
713 the pedunculus is occupied by other cell classes such as APL and non-olfactory KCs from  
714 accessory calyces (i.e. KC- $\alpha/\beta$ p and KC- $\gamma$ d), hence there are no magenta points in this region.

715

## 716 Supplemental Figure 2

717 (A) Distribution of number of claws per KC for all randomly sampled KCs (mean  $\pm$  s.d.,  $5.2 \pm$   
718 1.6).

719 (B) The number of postsynaptic KCs per PN type is consistent between the current study and the  
720 connectome deriving from the recent 'Hemibrain' dataset (v. 1.0.1; Scheffer et al., 2020). Each  
721 point represents a PN type; three or more synapses between a unique PN-KC pair is counted as  
722 an individual PN-KC connection. Since the two datasets have different numbers of reconstructed  
723 KCs, output from each PN type is represented as a percentage. There is a tight correlation across  
724 the two datasets ( $r^2=0.83$ ; blue-gray, 95% confidence interval along the regression line).

725 (C) The same data as in (B), with PN types identified.

726

## 727 Supplemental Figure 3



728 (A) Figure 1D, with colored boundaries delineating the matrix subregions for which z-score  
729 distributions are shown in (B-D). The distributions are significantly different (B, green; C,  
730 yellow; D, blue).

731 (B) Distribution of z-scores for community PN types (green area in panel A).

732 (C) Distribution of z-scores for PN types weakly clustering with the community PNs (yellow  
733 area in panel A). It is significantly different from the community PN distribution (K-S test  $p <$   
734  $1 \times 10^{-10}$ ).

735 (D) Distribution of z-scores for remaining PN types (blue area in panel A). It is significantly  
736 different from the community PN distribution (B, above; K-S test  $p < 1 \times 10^{-10}$ ) and the weakly  
737 clustering PN types (C, above; K-S test  $p < 1 \times 10^{-10}$ ).

738 (E) Conditional input analysis of a single representative network from the random bouton model,  
739 shows no clustered structure in the z-score matrix. The random bouton model was also used as  
740 the null model. Any connectivity structure that deviates from the null model will manifest as  
741 clusters of high or low z-scores (2 s.d. or more as compared to the mean of the null model) in the  
742 matrix. No discernible cluster is seen after re-clustering of the z-score matrix, showing that the  
743 observed clustering is unlikely to be an artifactual result from an expected distribution of random  
744 values.

745

#### 746 Supplemental Figure 4

747

748 (A) Co-variance analysis (Methods) of the observed PN-to-KC connectivity. This approach  
749 generates a symmetric matrix of p-values for PN type combinations. The lower the p-value, the

750 less likely the observed convergence of the PN type pair onto postsynaptic KCs is expected to  
751 occur by chance. Values  $< 0.05$  are color coded in yellow; others are black. The column-row  
752 ordering of PN types is the same as in Figure 1D. The PN community is discernible as a mostly  
753 yellow square at the top left. PN type response categories are color coded as in Figure 1D.

754 (B) As in (A), except the covariance matrix is reordered using unsupervised K-means clustering  
755 on p-values. The PN community (type names in bold) is reconstituted following this re-  
756 clustering. Two weaker clusters of PN types (red and blue squares, overlaid) are discernible.

757 (C) As in (A), except covariance between synapse counts between each PN and KC pair was  
758 quantified. The PN community is still discernible.

759 (D) As in (B), except covariance between synapse counts between each PN and KC pair was  
760 quantified. As with (A-C), the PN community types comprise the dominant cluster, confirming  
761 that the main finding is robust to different analysis methods.

762 (E) The z-score matrix from the conditional input analysis (Figure 1D) is re-ordered with the  
763 order given by K-means clustering of the co-variance matrix as shown in (B). The re-ordering  
764 reveals the same two weaker clusters of PNs as seen in (B).

765 (F) Anterior view of MB calyx shows axon collaterals of reconstructed PNs of the types shown  
766 in the top left weak cluster in (B), demarcated by a red square. The PN collaterals occupy a  
767 conscribed territory within the MB main calyx.

768 (G) As in (F), except the PN types are from the second weak cluster in (B), demarcated by a blue  
769 square.

770

771 Supplemental Figure 5

772 (A) In a model using the observed PN-to-KC network, stimulus discrimination by food odorant-  
773 responsive PNs is superior to discrimination by other PN types. The classifier seeks to  
774 discriminate different sets of PN activity patterns based on the KC responses, which are  
775 integrated via the observed PN-to-KC connectivity (for schematic see Figure 1D). In each set of  
776 PN activity patterns, 38 PNs are activated. The red dot ( $x=0.03$ ) indicates average performance  
777 from 1,000 simulations of the model with activation of all food-responsive PNs (38 in total,  
778 including PN types that are not part of the community identified in Figure 1D). The distribution  
779 (mean 0.057, s.e. 0.007) shows error rates from 1,000 sets of 38 non-food PNs that are activated.  
780 Each data point represents the average error rate for a set of 38 PNs randomly selected from all  
781 non-food PNs. The number of non-food PNs that are activated (38) is kept consistent with the  
782 total number of food PNs. Observed vs. blue histogram, z-score - 4.0,  $p < 1 \times 10^{-4}$ .

783 (B) With a randomized PN-to-KC network, activating varying fractions of community PNs  
784 results in unchanging classification performance. Each KC claw is randomly assigned to a PN  
785 with equal probability for each PN, and each PN-claw pair is assigned a number of synapses  
786 randomly drawn from the distribution of synaptic counts for all manually reconstructed claws.  
787 For each plotted data point, the same number of PNs (16) is activated, but with a varying  
788 fractions of community PNs (indicated in x-axis). Each data point is the average of 1,000  
789 simulations, each of which represents a combination of randomly selected community PNs and  
790 non-community PNs according to the indicated fractions (e.g. in the case of 0.5, 8 randomly  
791 selected community PNs and 8 randomly selected non-community PNs).

792

793 Supplemental Figure 6

794 (A) Conditional input analysis was applied to a representative instance of the local random  
795 bouton model, with the random bouton model as the null model. Conditional input analysis was  
796 applied to a representative instance of the random claw model, with the random claw model as  
797 the null model. No cluster of high or low z-scores (2 s.d. or more as compared to the mean of the  
798 null model) is seen after K-means re-clustering of the z-score matrix.

799 (B) Distribution of z-scores from conditional input analysis using random bouton null model (z-  
800 scores in Figure 1D; i.e. observed vs. random bouton model, mean -0.044, s.d. 2.11) and analysis  
801 using the random claw null model (z-scores in Figure 2D; i.e. observed vs. random claw model,  
802 mean -0.058, s.d. 1.47). Blue vs. orange distributions, K-S test  $p < 1 \times 10^{-10}$ . Variance of z-scores  
803 is lower using the random claw model than the random bouton model, indicating that the random  
804 claw model better captures the observed network structure.

805

#### 806 Supplemental Figure 7

807 (A) Conditional input analysis of PN-to-KC connectivity data from Caron et al. (2013), using  
808 the random bouton null model (Methods). A weak cluster of overconvergent PN types is seen in  
809 the lower right corner of the matrix, consistent with the previously reported set of types making  
810 the most output onto KCs (Supplemental Figure 1, Caron et al., 2013). This cluster does not  
811 overlap strongly with the overconvergent PN community described in the present work (PN type  
812 names color coded and bolded as in Figure 1D).

813 (B) Histogram view of data underlying (A). The y-axis shows the mean number of claws  
814 receiving input from each PN type in the random bouton null model (blue) and in observed  
815 counts the Caron et al. (2013) data (yellow). PN types are ordered as in (A).

816 (C) Conditional input analysis as in (A), except using the random claw null model, which  
817 incorporates the observed output rate of each PN type. No overconvergent PN type clusters are  
818 discernible using this model.

819 (D) Conditional input analysis of a representatively randomly sampled subset of PN-to-KC  
820 connectivity from the current study shows only weak clustering (most z-scores  $< 2$ ). The number  
821 of KCs, and KCs per claw, was held equal to that of the Caron et al. (2013) study.

822

### 823 Supplemental Figure 8

824 (A) Fasciculating KCs ('bundle' KCs) in the pedunculus. A transverse plane image of the  
825 pedunculus (shaded blue) shows a discrete bundle of KCs (blue outline) that was completely  
826 reconstructed. The black rectangle delineates the subarea shown in (B).

827 (B) Magnified view of the cross-sectional profile of bundle KC axons (magenta dots) in the  
828 pedunculus.

829

### 830 Supplemental Figure 9

831 (A) A high dimensional olfactory space is represented schematically here as two-dimensional  
832 (x,y axes). Kenyon cells (red dots, upper panel) may be considered as points in this space, with  
833 positions defined by their PN inputs. In a random PN-to-KC wiring, the probability that a KC is  
834 responsive at a particular position along the y dimension is independent from its responses along  
835 the x dimension (lower panel).

836 (B) In the PN-to-KC network structure we observe, KCs receive convergent input from PNs  
837 responsive to food-related odorants more often than predicted by chance. Schematically, this

838 may be represented as a non-uniform distribution of KCs within the high dimensional olfactory  
 839 space defined by PN inputs, analogous to the denser sampling of a visual scene in the fovea of  
 840 the retina. In this case, the probability that a given KC is responsive to a particular odor along the  
 841 y axis is *not* independent from whether it is responsive to an odor on the x axis (lower panel).  
 842 Assuming the fly has a constant number of KCs regardless of network structure (i.e. the number  
 843 of red dots is the same no matter what), then within the 'associational fovea' (green circle, upper  
 844 panel), the probability is substantially increased, and everywhere else the probability is slightly  
 845 decreased (lower panel).

846

847 Supplemental Table 1

| <b>PN types</b> | <b>Behavioral Significance</b> | <b>Literature</b>                                                                                                                                    |
|-----------------|--------------------------------|------------------------------------------------------------------------------------------------------------------------------------------------------|
| D               | Unknown*                       | *multiple: aversive (Knaden et al., 2012), pheromonal (Lebreton et al., 2017), and yeast volatiles (ethyl 3-hydroxyhexanoate, Tsakiris et al., 2010) |
| DA1             | Pheromonal                     | (Kurtovic et al., 2007)                                                                                                                              |
| DA2             | Aversive                       | (Stensmyr et al., 2012)                                                                                                                              |
| DA3             | Unknown                        |                                                                                                                                                      |
| DA4l            | Aversive                       | (Badel et al., 2016)                                                                                                                                 |
| DA4m            | Unknown                        |                                                                                                                                                      |
| DC1             | Egg-laying                     | (Dweck et al., 2013)                                                                                                                                 |
| DC2             | Aversive                       | (Knaden et al., 2012)                                                                                                                                |
| DC3             | Food                           | (Ronderos et al., 2014)                                                                                                                              |
| DC4             | Aversive                       | (Ai et al., 2010)                                                                                                                                    |
| DL1             | Unknown                        |                                                                                                                                                      |
| DL2d            | Food                           | (Mansourian and Stensmyr, 2015)                                                                                                                      |
| DL2v            | Food                           | (Mansourian and Stensmyr, 2015)                                                                                                                      |
| DL3             | Pheromonal                     | (van der Goes van Naters and Carlson, 2007)                                                                                                          |
| DL4             | Aversive                       | (Ebrahim et al., 2015)                                                                                                                               |
| DL5             | Aversive                       | (Knaden et al., 2012)                                                                                                                                |
| DM1             | Food                           | (Semmelhack and Wang, 2009)                                                                                                                          |
| DM2             | Food                           | (Schubert et al., 2014)                                                                                                                              |
| DM3             | Food                           | (Semmelhack and Wang, 2009)                                                                                                                          |
| DM4             | Food                           | (Badel et al., 2016; Semmelhack and Wang, 2009)                                                                                                      |
| DM5             | Aversive                       | (Semmelhack and Wang, 2009)                                                                                                                          |
| DM6             | Food                           | (Schubert et al., 2014)                                                                                                                              |
| DP1l            | Food                           | (Mansourian and Stensmyr, 2015; Silbering et al., 2011)                                                                                              |
| DP1m            | Food                           | (Semmelhack and Wang, 2009)                                                                                                                          |
| V               | Aversive                       | (Suh et al., 2004)                                                                                                                                   |
| VA1d            | Pheromonal                     | (van der Goes van Naters and Carlson, 2007)                                                                                                          |

|      |            |                                                                                                  |
|------|------------|--------------------------------------------------------------------------------------------------|
| VA1v | Pheromonal | (Dweck et al., 2015b)                                                                            |
| VA2  | Food       | (Semmelhack and Wang, 2009)                                                                      |
| VA3  | Unknown    |                                                                                                  |
| VA4  | Food       | (Laissue and Vosshall, 2008)                                                                     |
| VA5  | Unknown    |                                                                                                  |
| VA6  | Food       | (Mansourian and Stensmyr, 2015; Schlieff and Wilson, 2007)                                       |
| VA7l | Aversive   | (Mansourian and Stensmyr, 2015)                                                                  |
| VA7m | Unknown    |                                                                                                  |
| VC1  | Unknown    |                                                                                                  |
| VC2  | Unknown¶   | ¶ unclear: dietary antioxidants (Dweck et al., 2015a); suppress oviposition, (Chin et al., 2018) |
| VC3l | Food       | (Laissue and Vosshall, 2008)                                                                     |
| VC3m | Food       | (Laissue and Vosshall, 2008)                                                                     |
| VC4  | Unknown    |                                                                                                  |
| VC5  | Egg-laying | (Hussain et al., 2016)                                                                           |
| VL1  | Unknown    |                                                                                                  |
| VL2a | Food       | (Grosjean et al., 2011)                                                                          |
| VL2p | Aversive   | (Hamada et al., 2008)                                                                            |
| VM1  | Food       | (Min et al., 2013)                                                                               |
| VM2  | Food       | (Root et al., 2007)                                                                              |
| VM3  | Food       | (Mansourian and Stensmyr, 2015)                                                                  |
| VM4  | Unknown    |                                                                                                  |
| VM5d | Food       | (Hallem and Carlson, 2006)                                                                       |
| VM5v | Food       | (Mansourian and Stensmyr, 2015)                                                                  |
| VM7d | Food       | (Laissue and Vosshall, 2008)                                                                     |
| VM7v | Unknown    |                                                                                                  |
| VP1  | Others     | temperature (Enjin et al., 2016)                                                                 |
| VP2  | Others     | temperature (Frank et al., 2015; Liu et al., 2015)                                               |
| VP3  | Others     | temperature (Enjin et al., 2016)                                                                 |

848

849

## Acknowledgements

850

851

852

853

854

855

856

857

858

859

860

861

We thank: Greg Jefferis and Paavo Huoviala for substantial contributions to the literature search to classify PN types for behavioral significance; Greg Jefferis, Eyal Gruntman, Shaul Druckman, Larry Abbott, Ashok Litwin-Kumar, and Marcus Meister for helpful discussion of preliminary data; Jacob Ratliff, Shahrozia Imtiaz, Benjamin Gorko, Arynne Boyes, Adam John, Emily Moore, Ben Koppenhaver, Philipp Ranft, bailey harrison, Sri Murthy, Ala Haddad, Addy Adesina, Ashley Scott, Chelsea Marlin, Emily Wissell, Zachary Gillis, Saba Ali, Gabrielle Allred, Spencer Waters, Lisa Marin, Annie Scott, Sarah Mohr, Michael Lingelbach, Emma Spillman, Aidan Smith, Teri Ngo, Jordan Dunlap, Bindu Gampah, Melissa Ryan, Nethan Reddy, Adam Fischel, Markus Pleijzier, Arlo Sheridan, Kabas Abou Jahjah, Amelia Edmondson-Stait, Ilenia Salaris, Ruchi Parekh, Austin Warner, Winston Chen, Ruairi Roberts, Julia Gonzales, Laurin Bueld, Cory Ardekani, Razi Rais, Niles Ribeiro, Teresa Neves for Kenyon cell reconstructions; Noah Nelson, for pilot software for analysis of the PN-to-KC connectivity graph

862 at the level of boutons and claws; J. Scott Lauritzen, for help coordinating reconstruction efforts.  
863 Funding: Howard Hughes Medical Institute; Wellcome Trust collaborative award  
864 203261/Z/16/Z; NIMH BRAIN Initiative award 1RF1MH120679-01.

865

### 866 **Availability of Source Code and Neuronal Reconstructions**

867 The neuronal reconstructions and source code underlying the analyses presented here are  
868 available at: [https://github.com/bocklab/pn\\_kc](https://github.com/bocklab/pn_kc). Neuronal reconstructions are also available at the  
869 Virtual Fly Brain Project  
870 ([https://v2.virtualflybrain.org/org.geppetto.frontend/geppetto?id=vfb\\_site/overview.htm](https://v2.virtualflybrain.org/org.geppetto.frontend/geppetto?id=vfb_site/overview.htm)).

871

872

873 Ai, M., Min, S., Grosjean, Y., Leblanc, C., Bell, R., Benton, R., and Suh, G.S. (2010). Acid  
874 sensing by the *Drosophila* olfactory system. *Nature* 468, 691-695.

875 Albus, J.S. (1971). A theory of cerebellar function. *Mathematical Biosciences* 10, 25-61.

876 Amin, H., Suarez-Grimalt, R., Vrontou, E., and Lin, A.C. (2020). Localized inhibition in the  
877 *Drosophila* mushroom body. 2020.2003.2026.008300.

878 Aso, Y., Grubel, K., Busch, S., Friedrich, A.B., Siwanowicz, I., and Tanimoto, H. (2009). The  
879 mushroom body of adult *Drosophila* characterized by GAL4 drivers. *J Neurogenet* 23,  
880 156-172.

881 Aso, Y., Hattori, D., Yu, Y., Johnston, R.M., Iyer, N.A., Ngo, T.T., Dionne, H., Abbott, L.F.,  
882 Axel, R., Tanimoto, H., *et al.* (2014). The neuronal architecture of the mushroom body  
883 provides a logic for associative learning. *Elife* 3, e04577.

884 Aso, Y., and Rubin, G.M. (2020). Toward nanoscale localization of memory engrams in  
885 *Drosophila*. *J Neurogenet*, 1-5.

886 Athreya, A., Fishkind, D.E., Tang, M., Priebe, C.E., Park, Y., Vogelstein, J.T., Levin, K.,  
887 Lyzinski, V., and Qin, Y. (2017). Statistical inference on random dot product graphs: a  
888 survey. *The Journal of Machine Learning Research* 18, 8393-8484.



- 889 Babadi, B., and Sompolinsky, H. (2014). Sparseness and expansion in sensory  
890 representations. *Neuron* *83*, 1213-1226.
- 891 Badel, L., Ohta, K., Tsuchimoto, Y., and Kazama, H. (2016). Decoding of Context-  
892 Dependent Olfactory Behavior in *Drosophila*. *Neuron* *91*, 155-167.
- 893 Barak, O., Rigotti, M., and Fusi, S. (2013). The Sparseness of Mixed Selectivity Neurons  
894 Controls the Generalization-Discrimination Trade-Off. *Journal of Neuroscience* *33*, 3844-  
895 3856.
- 896 Bargmann, C.I., and Marder, E. (2013). From the connectome to brain function. *Nat*  
897 *Methods* *10*, 483-490.
- 898 Barlow, H.B. (2012). Possible Principles Underlying the Transformations of Sensory  
899 Messages. In *Sensory Communication* (The MIT Press).
- 900 Barnstedt, O., Oswald, D., Felsenberg, J., Brain, R., Moszynski, J.P., Talbot, C.B., Perrat,  
901 P.N., and Waddell, S. (2016). Memory-Relevant Mushroom Body Output Synapses Are  
902 Cholinergic. *Neuron* *89*, 1237-1247.
- 903 Bates, A.S., Schlegel, P., Roberts, R.J.V., Drummond, N., Tamimi, I.F.M., Turnbull, R.,  
904 Zhao, X., Marin, E.C., Popovici, P.D., Dhawan, S., *et al.* (2020). Complete connectomic  
905 reconstruction of olfactory projection neurons in the fly brain. 2020.2001.2019.911453.
- 906 Bhandawat, V., Olsen, S.R., Gouwens, N.W., Schlieff, M.L., and Wilson, R.I. (2007).  
907 Sensory processing in the *Drosophila* antennal lobe increases reliability and separability  
908 of ensemble odor representations. *Nat Neurosci* *10*, 1474-1482.
- 909 Bopp, R., Macarico da Costa, N., Kampa, B.M., Martin, K.A., and Roth, M.M. (2014).  
910 Pyramidal cells make specific connections onto smooth (GABAergic) neurons in mouse  
911 visual cortex. *PLoS Biol* *12*, e1001932.
- 912 Brown, S.P., and Hestrin, S. (2009). Intracortical circuits of pyramidal neurons reflect  
913 their long-range axonal targets. *Nature* *457*, 1133-1136.

- 914 Butcher, N.J., Friedrich, A.B., Lu, Z., Tanimoto, H., and Meinertzhagen, I.A. (2012).  
915 Different classes of input and output neurons reveal new features in microglomeruli of  
916 the adult *Drosophila* mushroom body calyx. *J Comp Neurol* 520, 2185-2201.
- 917 Caron, S.J., Ruta, V., Abbott, L.F., and Axel, R. (2013). Random convergence of olfactory  
918 inputs in the *Drosophila* mushroom body. *Nature* 497, 113-117.
- 919 Cayco-Gajic, N.A., and Silver, R.A. (2019). Re-evaluating Circuit Mechanisms Underlying  
920 Pattern Separation. *Neuron* 101, 584-602.
- 921 Chin, S.G., Maguire, S.E., Huoviala, P., Jefferis, G., and Potter, C.J. (2018). Olfactory  
922 Neurons and Brain Centers Directing Oviposition Decisions in *Drosophila*. *Cell Rep* 24,  
923 1667-1678.
- 924 Christiansen, F., Zube, C., Andlauer, T.F., Wichmann, C., Fouquet, W., Oswald, D., Mertel,  
925 S., Leiss, F., Tavosanis, G., Luna, A.J., *et al.* (2011). Presynapses in Kenyon cell dendrites  
926 in the mushroom body calyx of *Drosophila*. *J Neurosci* 31, 9696-9707.
- 927 Costa, M., Manton, J.D., Ostrovsky, A.D., Prohaska, S., and Jefferis, G.S.X.E. (2016).  
928 NBLAST: Rapid, Sensitive Comparison of Neuronal Structure and Construction of Neuron  
929 Family Databases. *Neuron* 91, 293-311.
- 930 Crittenden, J.R., Skoulakis, E.M., Han, K.A., Kalderon, D., and Davis, R.L. (1998). Tripartite  
931 mushroom body architecture revealed by antigenic markers. *Learn Mem* 5, 38-51.
- 932 Dana, H., Mohar, B., Sun, Y., Narayan, S., Gordus, A., Hasseman, J.P., Tsegaye, G., Holt,  
933 G.T., Hu, A., Walpita, D., *et al.* (2016). Sensitive red protein calcium indicators for  
934 imaging neural activity. *Elife* 5.
- 935 DasGupta, S., Ferreira, C.H., and Miesenbock, G. (2014). FoxP influences the speed and  
936 accuracy of a perceptual decision in *Drosophila*. *Science* 344, 901-904.
- 937 Dasgupta, S., Stevens, C.F., and Navlakha, S. (2017). A neural algorithm for a  
938 fundamental computing problem. *Science* 358, 793-796.

939 Dickinson, M.H., and Muijres, F.T. (2016). The aerodynamics and control of free flight  
940 manoeuvres in *Drosophila*. *Philos Trans R Soc Lond B Biol Sci* *371*.

941 Dionne, H., Hibbard, K.L., Cavallaro, A., Kao, J.C., and Rubin, G.M. (2018). Genetic  
942 Reagents for Making Split-GAL4 Lines in *Drosophila*. *Genetics* *209*, 31-35.

943 Dweck, H.K., Ebrahim, S.A., Farhan, A., Hansson, B.S., and Stensmyr, M.C. (2015a).  
944 Olfactory proxy detection of dietary antioxidants in *Drosophila*. *Curr Biol* *25*, 455-466.

945 Dweck, H.K., Ebrahim, S.A., Kromann, S., Bown, D., Hillbur, Y., Sachse, S., Hansson, B.S.,  
946 and Stensmyr, M.C. (2013). Olfactory preference for egg laying on citrus substrates in  
947 *Drosophila*. *Curr Biol* *23*, 2472-2480.

948 Dweck, H.K., Ebrahim, S.A., Thoma, M., Mohamed, A.A., Keeseey, I.W., Trona, F., Lavista-  
949 Llanos, S., Svatos, A., Sachse, S., Knaden, M., *et al.* (2015b). Pheromones mediating  
950 copulation and attraction in *Drosophila*. *Proc Natl Acad Sci U S A* *112*, E2829-2835.

951 Ebrahim, S.A., Dweck, H.K., Stokl, J., Hofferberth, J.E., Trona, F., Weniger, K., Rybak, J.,  
952 Seki, Y., Stensmyr, M.C., Sachse, S., *et al.* (2015). *Drosophila* Avoids Parasitoids by  
953 Sensing Their Semiochemicals via a Dedicated Olfactory Circuit. *PLoS Biol* *13*, e1002318.

954 Egger, R., Dercksen, V.J., Udvary, D., Hege, H.C., and Oberlaender, M. (2014). Generation  
955 of dense statistical connectomes from sparse morphological data. *Front Neuroanat* *8*,  
956 129.

957 Eichler, K., Li, F., Litwin-Kumar, A., Park, Y., Andrade, I., Schneider-Mizell, C.M.,  
958 Saumweber, T., Huser, A., Eschbach, C., Gerber, B., *et al.* (2017). The complete  
959 connectome of a learning and memory centre in an insect brain. *Nature* *548*, 175-182.

960 Enjin, A., Zaharieva, E.E., Frank, D.D., Mansourian, S., Suh, G.S., Gallio, M., and Stensmyr,  
961 M.C. (2016). Humidity Sensing in *Drosophila*. *Curr Biol* *26*, 1352-1358.

962 Farris, S.M. (2011). Are mushroom bodies cerebellum-like structures? *Arthropod Struct*  
963 *Dev* *40*, 368-379.

964 Felsenberg, J., Jacob, P.F., Walker, T., Barnstedt, O., Edmondson-Stait, A.J., Pleijzier,  
965 M.W., Otto, N., Schlegel, P., Sharifi, N., Perisse, E., *et al.* (2018). Integration of Parallel  
966 Opposing Memories Underlies Memory Extinction. *Cell* *175*, 709-722 e715.

967 Frank, D.D., Jouandet, G.C., Kearney, P.J., Macpherson, L.J., and Gallio, M. (2015).  
968 Temperature representation in the Drosophila brain. *Nature* *519*, 358-361.

969 Groschner, L.N., and Miesenbock, G. (2019). Mechanisms of Sensory Discrimination:  
970 Insights from Drosophila Olfaction. *Annu Rev Biophys* *48*, 209-229.

971 Grosjean, Y., Rytz, R., Farine, J.P., Abuin, L., Cortot, J., Jefferis, G.S., and Benton, R.  
972 (2011). An olfactory receptor for food-derived odours promotes male courtship in  
973 Drosophila. *Nature* *478*, 236-240.

974 Gruntman, E., and Turner, G.C. (2013). Integration of the olfactory code across dendritic  
975 claws of single mushroom body neurons. *Nat Neurosci* *16*, 1821-1829.

976 Guven-Ozkan, T., and Davis, R.L. (2014). Functional neuroanatomy of Drosophila  
977 olfactory memory formation. *Learn Mem* *21*, 519-526.

978 Hallem, E.A., and Carlson, J.R. (2006). Coding of odors by a receptor repertoire. *Cell* *125*,  
979 143-160.

980 Hamada, F.N., Rosenzweig, M., Kang, K., Pulver, S.R., Ghezzi, A., Jegla, T.J., and Garrity,  
981 P.A. (2008). An internal thermal sensor controlling temperature preference in  
982 Drosophila. *Nature* *454*, 217-220.

983 Hansel, D., and van Vreeswijk, C. (2012). The mechanism of orientation selectivity in  
984 primary visual cortex without a functional map. *J Neurosci* *32*, 4049-4064.

985 Heisenberg, M. (2003). Mushroom body memoir: from maps to models. *Nat Rev*  
986 *Neurosci* *4*, 266-275.

987 Hige, T., Aso, Y., Rubin, G.M., and Turner, G.C. (2015). Plasticity-driven individualization  
988 of olfactory coding in mushroom body output neurons. *Nature* *526*, 258-262.

989 Hussain, A., Zhang, M., Ucpunar, H.K., Svensson, T., Quillery, E., Gompel, N., Ignell, R.,  
990 and Grunwald Kadow, I.C. (2016). Ionotropic Chemosensory Receptors Mediate the  
991 Taste and Smell of Polyamines. *PLoS Biol* *14*, e1002454.

992 Inada, K., Tsuchimoto, Y., and Kazama, H. (2017). Origins of Cell-Type-Specific Olfactory  
993 Processing in the *Drosophila* Mushroom Body Circuit. *Neuron* *95*, 357-367 e354.

994 Ito, K., Awano, W., Suzuki, K., Hiromi, Y., and Yamamoto, D. (1997). The *Drosophila*  
995 mushroom body is a quadruple structure of clonal units each of which contains a  
996 virtually identical set of neurones and glial cells. *Development* *124*, 761-771.

997 Jefferis, G.S., Potter, C.J., Chan, A.M., Marin, E.C., Rohlfsing, T., Maurer, C.R., Jr., and Luo,  
998 L. (2007). Comprehensive maps of *Drosophila* higher olfactory centers: spatially  
999 segregated fruit and pheromone representation. *Cell* *128*, 1187-1203.

1000 Jonas, E., and Kording, K. (2015). Automatic discovery of cell types and microcircuitry  
1001 from neural connectomics. *Elife* *4*, e04250.

1002 Kasthuri, N., Hayworth, K.J., Berger, D.R., Schalek, R.L., Conchello, J.A., Knowles-Barley,  
1003 S., Lee, D., Vazquez-Reina, A., Kaynig, V., Jones, T.R., *et al.* (2015). Saturated  
1004 Reconstruction of a Volume of Neocortex. *Cell* *162*, 648-661.

1005 Klapoetke, N.C., Murata, Y., Kim, S.S., Pulver, S.R., Birdsey-Benson, A., Cho, Y.K.,  
1006 Morimoto, T.K., Chuong, A.S., Carpenter, E.J., Tian, Z., *et al.* (2014). Independent optical  
1007 excitation of distinct neural populations. *Nat Methods* *11*, 338-346.

1008 Knaden, M., Strutz, A., Ahsan, J., Sachse, S., and Hansson, B.S. (2012). Spatial  
1009 representation of odorant valence in an insect brain. *Cell Rep* *1*, 392-399.

1010 Kornfeld, J., and Denk, W. (2018). Progress and remaining challenges in high-throughput  
1011 volume electron microscopy. *Curr Opin Neurobiol* *50*, 261-267.

1012 Koulakov, A.A., Kolterman, B.E., Enikolopov, A.G., and Rinberg, D. (2011). In search of  
1013 the structure of human olfactory space. *Front Syst Neurosci* *5*, 65.

1014 Kremer, M.C., Christiansen, F., Leiss, F., Paehler, M., Knappek, S., Andlauer, T.F., Forstner,  
1015 F., Kloppenburg, P., Sigrist, S.J., and Tavosanis, G. (2010). Structural long-term changes  
1016 at mushroom body input synapses. *Curr Biol* 20, 1938-1944.

1017 Kurtovic, A., Widmer, A., and Dickson, B.J. (2007). A single class of olfactory neurons  
1018 mediates behavioural responses to a *Drosophila* sex pheromone. *Nature* 446, 542-546.

1019 Laissue, P.P., and Vosshall, L.B. (2008). The olfactory sensory map in *Drosophila*. *Adv Exp*  
1020 *Med Biol* 628, 102-114.

1021 Laughlin, S. (1981). A simple coding procedure enhances a neuron's information  
1022 capacity. *Z Naturforsch C Biosci* 36, 910-912.

1023 Lebreton, S., Borrero-Echeverry, F., Gonzalez, F., Solum, M., Wallin, E.A., Hedenstrom,  
1024 E., Hansson, B.S., Gustavsson, A.L., Bengtsson, M., Birgersson, G., *et al.* (2017). A  
1025 *Drosophila* female pheromone elicits species-specific long-range attraction via an  
1026 olfactory channel with dual specificity for sex and food. *BMC Biol* 15, 88.

1027 Lee, T., Lee, A., and Luo, L. (1999). Development of the *Drosophila* mushroom bodies:  
1028 sequential generation of three distinct types of neurons from a neuroblast.  
1029 *Development* 126, 4065-4076.

1030 Lee, W.C., Bonin, V., Reed, M., Graham, B.J., Hood, G., Glattfelder, K., and Reid, R.C.  
1031 (2016). Anatomy and function of an excitatory network in the visual cortex. *Nature* 532,  
1032 370-374.

1033 Leiss, F., Groh, C., Butcher, N.J., Meinertzhagen, I.A., and Tavosanis, G. (2009). Synaptic  
1034 organization in the adult *Drosophila* mushroom body calyx. *J Comp Neurol* 517, 808-824.

1035 Leitch, B., and Laurent, G. (1996). GABAergic synapses in the antennal lobe and  
1036 mushroom body of the locust olfactory system. *J Comp Neurol* 372, 487-514.

1037 Li, P.H., Lindsey, L.F., Januszewski, M., Zheng, Z., Bates, A.S., Taisz, I., Tyka, M., Nichols,  
1038 M., Li, F., Perlman, E., *et al.* (2019). Automated Reconstruction of a Serial-Section EM  
1039 *Drosophila* Brain with Flood-Filling Networks and Local Realignment. 605634.

1040 Lichtman, J.W., and Sanes, J.R. (2008). Ome sweet ome: what can the genome tell us  
1041 about the connectome? *Curr Opin Neurobiol* 18, 346-353.

1042 Lin, A.C., Bygrave, A.M., de Calignon, A., Lee, T., and Miesenbock, G. (2014). Sparse,  
1043 decorrelated odor coding in the mushroom body enhances learned odor discrimination.  
1044 *Nat Neurosci* 17, 559-568.

1045 Lin, H.H., Lai, J.S., Chin, A.L., Chen, Y.C., and Chiang, A.S. (2007). A map of olfactory  
1046 representation in the *Drosophila* mushroom body. *Cell* 128, 1205-1217.

1047 Litwin-Kumar, A., Harris, K.D., Axel, R., Sompolinsky, H., and Abbott, L.F. (2017). Optimal  
1048 Degrees of Synaptic Connectivity. *Neuron* 93, 1153-1164 e1157.

1049 Litwin-Kumar, A., and Turaga, S.C. (2019). Constraining computational models using  
1050 electron microscopy wiring diagrams. *Curr Opin Neurobiol* 58, 94-100.

1051 Liu, Q., Yang, X., Tian, J., Gao, Z., Wang, M., Li, Y., and Guo, A. (2016). Gap junction  
1052 networks in mushroom bodies participate in visual learning and memory in *Drosophila*.  
1053 *Elife* 5.

1054 Liu, W.W., Mazor, O., and Wilson, R.I. (2015). Thermosensory processing in the  
1055 *Drosophila* brain. *Nature* 519, 353-357.

1056 Liu, X., and Davis, R.L. (2009). The GABAergic anterior paired lateral neuron suppresses  
1057 and is suppressed by olfactory learning. *Nat Neurosci* 12, 53-59.

1058 MacQueen, J. (1967). Some methods for classification and analysis of multivariate  
1059 observations. Paper presented at: Proceedings of the fifth Berkeley symposium on  
1060 mathematical statistics and probability (Oakland, CA, USA).

- 1061 Mansourian, S., and Stensmyr, M.C. (2015). The chemical ecology of the fly. *Curr Opin*  
1062 *Neurobiol* 34, 95-102.
- 1063 Marr, D. (1969). A theory of cerebellar cortex. *J Physiol* 202, 437-470.
- 1064 Meinertzhagen, I.A. (2010). The organisation of invertebrate brains: cells, synapses and  
1065 circuits. 91, 64-71.
- 1066 Meinertzhagen, I.A. (2018). Of what use is connectomics? A personal perspective on the  
1067 *Drosophila* connectome. *J Exp Biol* 221.
- 1068 Min, S., Ai, M., Shin, S.A., and Suh, G.S. (2013). Dedicated olfactory neurons mediating  
1069 attraction behavior to ammonia and amines in *Drosophila*. *Proc Natl Acad Sci U S A* 110,  
1070 E1321-1329.
- 1071 Mishchenko, Y., Hu, T., Spacek, J., Mendenhall, J., Harris, K.M., and Chklovskii, D.B.  
1072 (2010). Ultrastructural Analysis of Hippocampal Neuropil from the Connectomics  
1073 Perspective. *Neuron* 67, 1009-1020.
- 1074 Murtagh, F., and Legendre, P. (2014). Ward's Hierarchical Agglomerative Clustering  
1075 Method: Which Algorithms Implement Ward's Criterion? *Journal of Classification* 31,  
1076 274-295.
- 1077 Murthy, M., Fiete, I., and Laurent, G. (2008). Testing odor response stereotypy in the  
1078 *Drosophila* mushroom body. *Neuron* 59, 1009-1023.
- 1079 Nern, A., Pfeiffer, B.D., and Rubin, G.M. (2015). Optimized tools for multicolor stochastic  
1080 labeling reveal diverse stereotyped cell arrangements in the fly visual system. *Proc Natl*  
1081 *Acad Sci U S A* 112, E2967-2976.
- 1082 Newman, M. (2018). 7. Measures and metrics. In *Networks* (Oxford University Press).
- 1083 Ofstad, T.A., Zuker, C.S., and Reiser, M.B. (2011). Visual place learning in *Drosophila*  
1084 *melanogaster*. *Nature* 474, 204-207.



1085 Olsen, S.R., and Wilson, R.I. (2008). Lateral presynaptic inhibition mediates gain control  
1086 in an olfactory circuit. *Nature* 452, 956-960.

1087 Oswald, D., and Waddell, S. (2015). Olfactory learning skews mushroom body output  
1088 pathways to steer behavioral choice in *Drosophila*. *Curr Opin Neurobiol* 35, 178-184.

1089 Pehlevan, C., Genkin, A., and Chklovskii, D.B. (2017). A clustering neural network model  
1090 of insect olfaction. Paper presented at: Signals, Systems, and Computers, 2017 51st  
1091 Asilomar Conference on (IEEE).

1092 Perisse, E., Burke, C., Huetteroth, W., and Waddell, S. (2013). Shocking revelations and  
1093 saccharin sweetness in the study of *Drosophila* olfactory memory. *Curr Biol* 23, R752-  
1094 763.

1095 Perisse, E., Oswald, D., Barnstedt, O., Talbot, C.B., Huetteroth, W., and Waddell, S.  
1096 (2016). Aversive Learning and Appetitive Motivation Toggle Feed-Forward Inhibition in  
1097 the *Drosophila* Mushroom Body. *Neuron* 90, 1086-1099.

1098 Rigotti, M., Barak, O., Warden, M.R., Wang, X.J., Daw, N.D., Miller, E.K., and Fusi, S.  
1099 (2013). The importance of mixed selectivity in complex cognitive tasks. *Nature* 497, 585-  
1100 590.

1101 Ronderos, D.S., Lin, C.C., Potter, C.J., and Smith, D.P. (2014). Farnesol-detecting olfactory  
1102 neurons in *Drosophila*. *J Neurosci* 34, 3959-3968.

1103 Root, C.M., Semmelhack, J.L., Wong, A.M., Flores, J., and Wang, J.W. (2007).  
1104 Propagation of olfactory information in *Drosophila*. *Proc Natl Acad Sci U S A* 104, 11826-  
1105 11831.

1106 Scheffer, L.K., Xu, C.S., Januszewski, M., Lu, Z., Takemura, S.-y., Hayworth, K.J., Huang,  
1107 G.B., Shinomiya, K., Maitin-Shepard, J., Berg, S., *et al.* (2020). A Connectome and  
1108 Analysis of the Adult *Drosophila* Central Brain. 2020.2004.2007.030213.

1109 Schlieff, M.L., and Wilson, R.I. (2007). Olfactory processing and behavior downstream  
1110 from highly selective receptor neurons. *Nat Neurosci* *10*, 623-630.

1111 Schneider-Mizell, C.M., Gerhard, S., Longair, M., Kazimiers, T., Li, F., Zwart, M.F.,  
1112 Champion, A., Midgley, F.M., Fetter, R.D., Saalfeld, S., *et al.* (2016). Quantitative  
1113 neuroanatomy for connectomics in *Drosophila*. *Elife* *5*.

1114 Schubert, M., Hansson, B.S., and Sachse, S. (2014). The banana code-natural blend  
1115 processing in the olfactory circuitry of *Drosophila melanogaster*. *Front Physiol* *5*, 59.

1116 Schürmann, F.-W. (1974). Bemerkungen zur funktion der corpora pedunculata im gehirn  
1117 der insekten aus morphologischer sicht. *Experimental Brain Research* *19*, 406-432.

1118 Seki, Y., Dweck, H.K.M., Rybak, J., Wicher, D., Sachse, S., and Hansson, B.S. (2017).  
1119 Olfactory coding from the periphery to higher brain centers in the *Drosophila* brain.  
1120 *BMC Biol* *15*, 56.

1121 Semmelhack, J.L., and Wang, J.W. (2009). Select *Drosophila* glomeruli mediate innate  
1122 olfactory attraction and aversion. *Nature* *459*, 218-223.

1123 Shomrat, T., Turchetti-Maia, A.L., Stern-Mentch, N., Basil, J.A., and Hochner, B. (2015).  
1124 The vertical lobe of cephalopods: an attractive brain structure for understanding the  
1125 evolution of advanced learning and memory systems. *J Comp Physiol A Neuroethol Sens*  
1126 *Neural Behav Physiol* *201*, 947-956.

1127 Silbering, A.F., Rytz, R., Grosjean, Y., Abuin, L., Ramdya, P., Jefferis, G.S., and Benton, R.  
1128 (2011). Complementary function and integrated wiring of the evolutionarily distinct  
1129 *Drosophila* olfactory subsystems. *J Neurosci* *31*, 13357-13375.

1130 Sporns, O., and Betzel, R.F. (2016). Modular Brain Networks. *Annu Rev Psychol* *67*, 613-  
1131 640.

1132 Stensmyr, M.C., Dweck, H.K., Farhan, A., Ibba, I., Strutz, A., Mukunda, L., Linz, J., Grabe,  
1133 V., Steck, K., Lavista-Llanos, S., *et al.* (2012). A conserved dedicated olfactory circuit for  
1134 detecting harmful microbes in *Drosophila*. *Cell* *151*, 1345-1357.

1135 Stevens, C.F. (2015). What the fly's nose tells the fly's brain. *Proc Natl Acad Sci U S A*  
1136 *112*, 9460-9465.

1137 Stocker, R.F., Lienhard, M.C., Borst, A., and Fischbach, K.F. (1990). Neuronal architecture  
1138 of the antennal lobe in *Drosophila melanogaster*. *Cell Tissue Res* *262*, 9-34.

1139 Sugie, A., Marchetti, G., and Tavosanis, G. (2018). Structural aspects of plasticity in the  
1140 nervous system of *Drosophila*. *Neural Dev* *13*, 14.

1141 Suh, G.S., Wong, A.M., Hergarden, A.C., Wang, J.W., Simon, A.F., Benzer, S., Axel, R., and  
1142 Anderson, D.J. (2004). A single population of olfactory sensory neurons mediates an  
1143 innate avoidance behaviour in *Drosophila*. *Nature* *431*, 854-859.

1144 Takemura, S.Y., Aso, Y., Hige, T., Wong, A., Lu, Z., Xu, C.S., Rivlin, P.K., Hess, H., Zhao, T.,  
1145 Parag, T., *et al.* (2017). A connectome of a learning and memory center in the adult  
1146 *Drosophila* brain. *Elife* *6*.

1147 Tanaka, N.K., Awasaki, T., Shimada, T., and Ito, K. (2004). Integration of chemosensory  
1148 pathways in the *Drosophila* second-order olfactory centers. *Curr Biol* *14*, 449-457.

1149 Tanaka, N.K., Tanimoto, H., and Ito, K. (2008). Neuronal assemblies of the *Drosophila*  
1150 mushroom body. *J Comp Neurol* *508*, 711-755.

1151 Technau, G., and Heisenberg, M. (1982). Neural reorganization during metamorphosis of  
1152 the corpora pedunculata in *Drosophila melanogaster*. *Nature* *295*, 405-407.

1153 Tsakiris, A., Koutinas, A.A., Psarianos, C., Kourkoutas, Y., and Bekatorou, A. (2010). A  
1154 new process for wine production by penetration of yeast in uncrushed frozen grapes.  
1155 *Appl Biochem Biotechnol* *162*, 1109-1121.

1156 Turner, G.C., Bazhenov, M., and Laurent, G. (2008). Olfactory representations by  
1157 *Drosophila* mushroom body neurons. *J Neurophysiol* *99*, 734-746.

1158 van der Goes van Naters, W., and Carlson, J.R. (2007). Receptors and neurons for fly  
1159 odors in *Drosophila*. *Curr Biol* *17*, 606-612.

1160 Venken, K.J., Simpson, J.H., and Bellen, H.J. (2011). Genetic manipulation of genes and  
1161 cells in the nervous system of the fruit fly. *Neuron* *72*, 202-230.

1162 Wong, A.M., Wang, J.W., and Axel, R. (2002). Spatial representation of the glomerular  
1163 map in the *Drosophila* protocerebrum. *Cell* *109*, 229-241.

1164 Yagi, R., Mabuchi, Y., Mizunami, M., and Tanaka, N.K. (2016). Convergence of  
1165 multimodal sensory pathways to the mushroom body calyx in *Drosophila melanogaster*.  
1166 *Sci Rep* *6*, 29481.

1167 Yasuyama, K., Meinertzhagen, I.A., and Schurmann, F.W. (2002). Synaptic organization  
1168 of the mushroom body calyx in *Drosophila melanogaster*. *J Comp Neurol* *445*, 211-226.

1169 Zhang, X., Coates, K., Dacks, A., Gunay, C., Lauritzen, J.S., Li, F., Calle-Schuler, S.A., Bock,  
1170 D., and Gaudry, Q. (2019). Local synaptic inputs support opposing, network-specific odor  
1171 representations in a widely projecting modulatory neuron. *Elife* *8*.

1172 Zheng, Z., Lauritzen, J.S., Perlman, E., Robinson, C.G., Nichols, M., Milkie, D., Torrens, O.,  
1173 Price, J., Fisher, C.B., Sharifi, N., *et al.* (2018). A Complete Electron Microscopy Volume  
1174 of the Brain of Adult *Drosophila melanogaster*. *Cell* *174*, 730-743 e722.

1175

**Figure 1. Structured olfactory input to the mushroom body.**

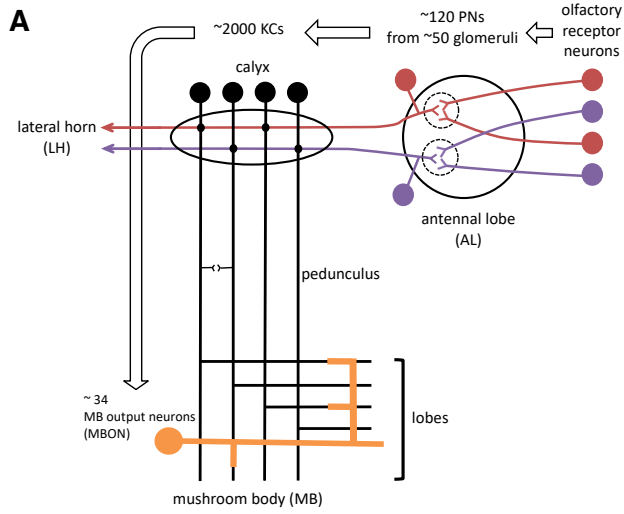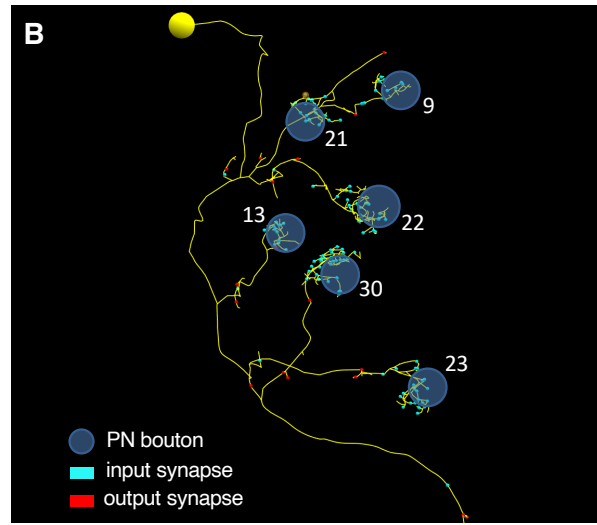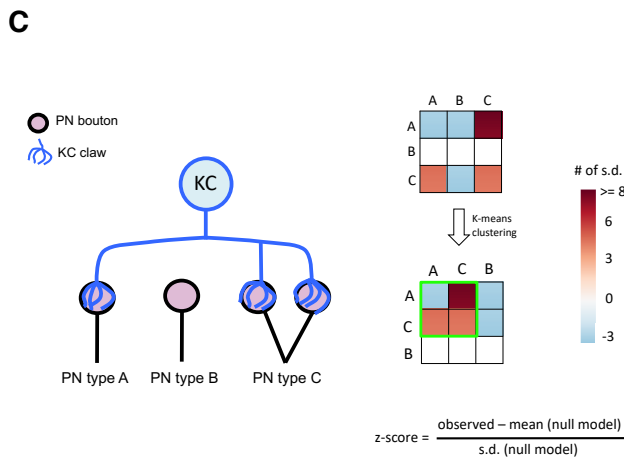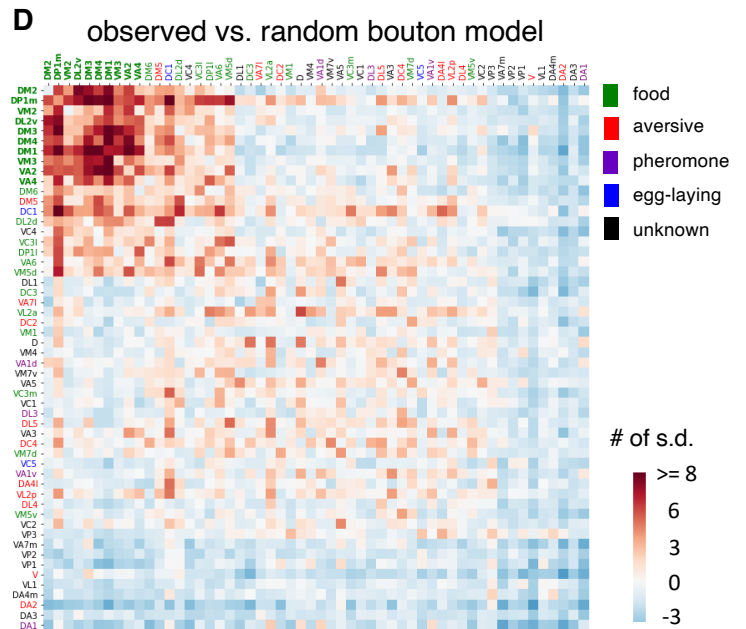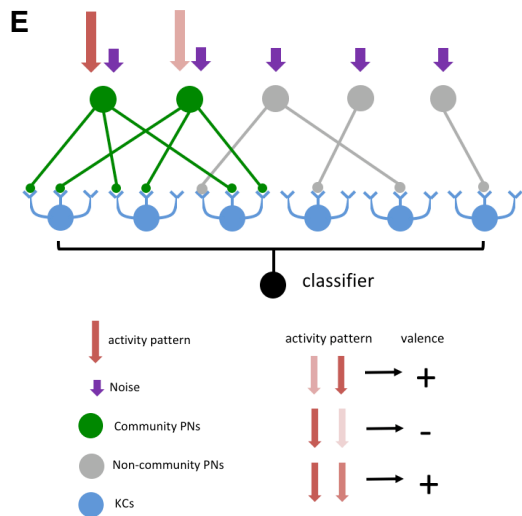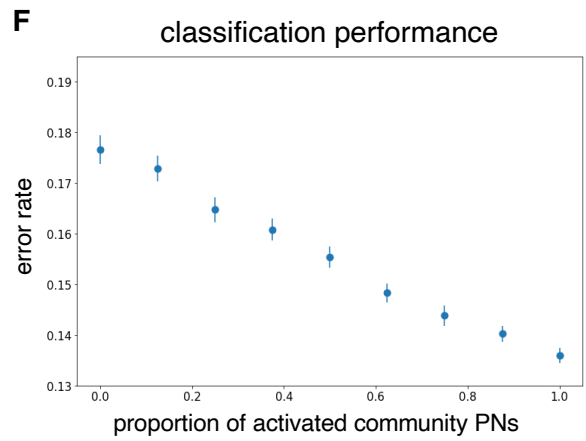

**Figure 2. Biased sampling of community PNs by KCs.**

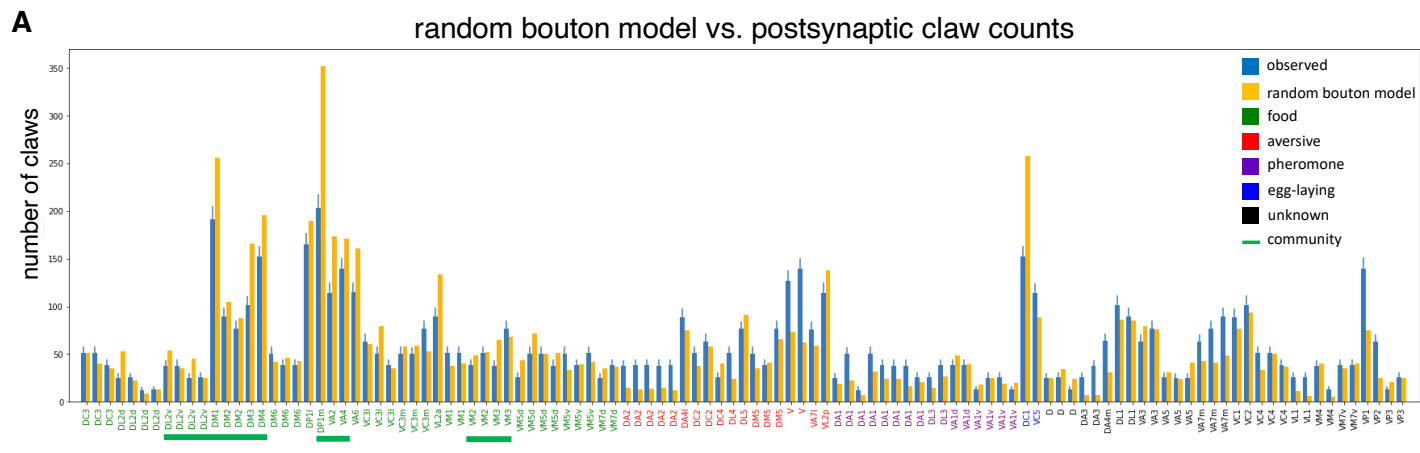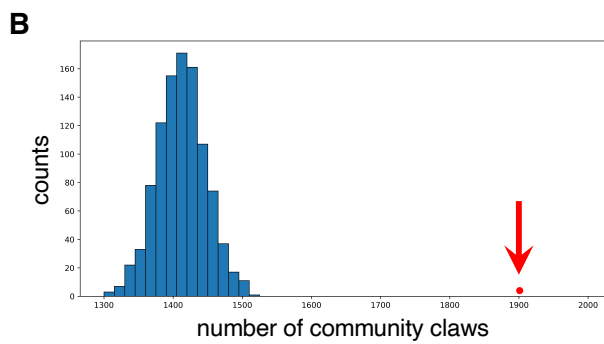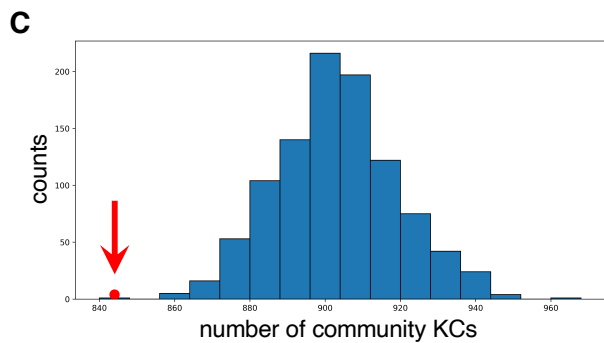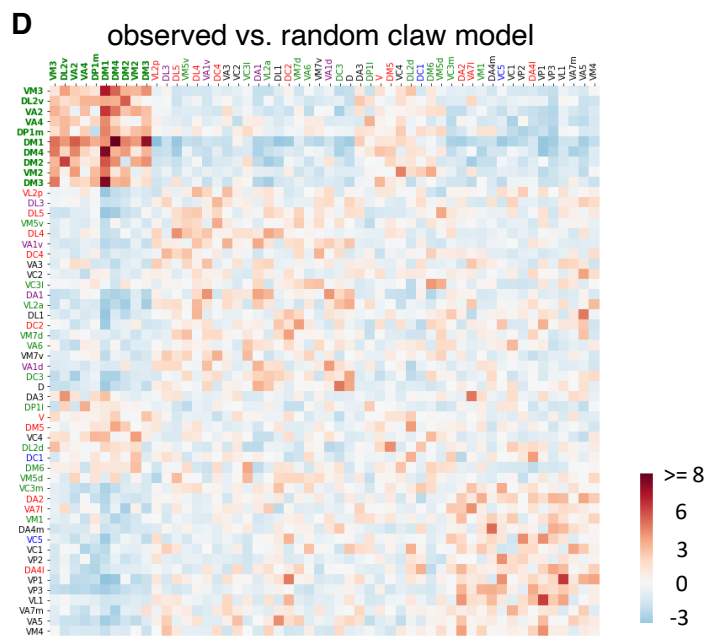

**Figure 3. Over-convergence of community PNs to KCs.**

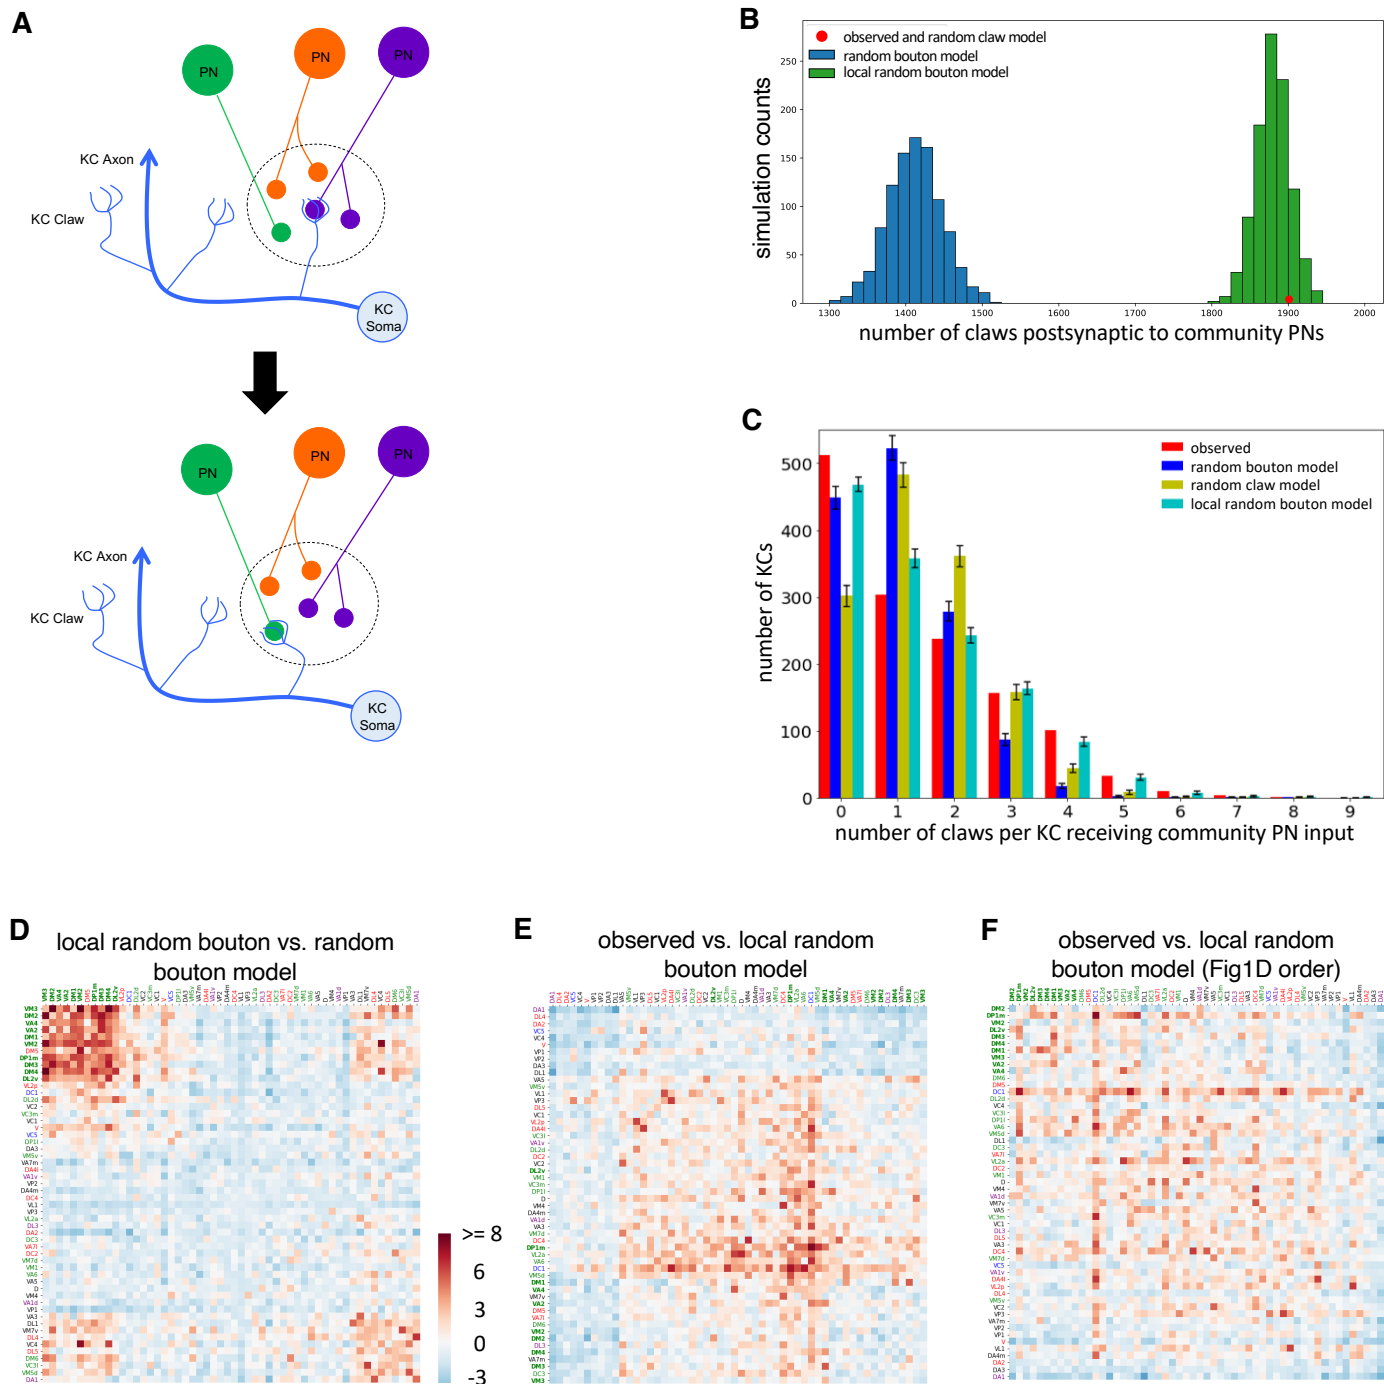

**Figure 4. Arbor overlap between subsets of community PNs and KCs.**

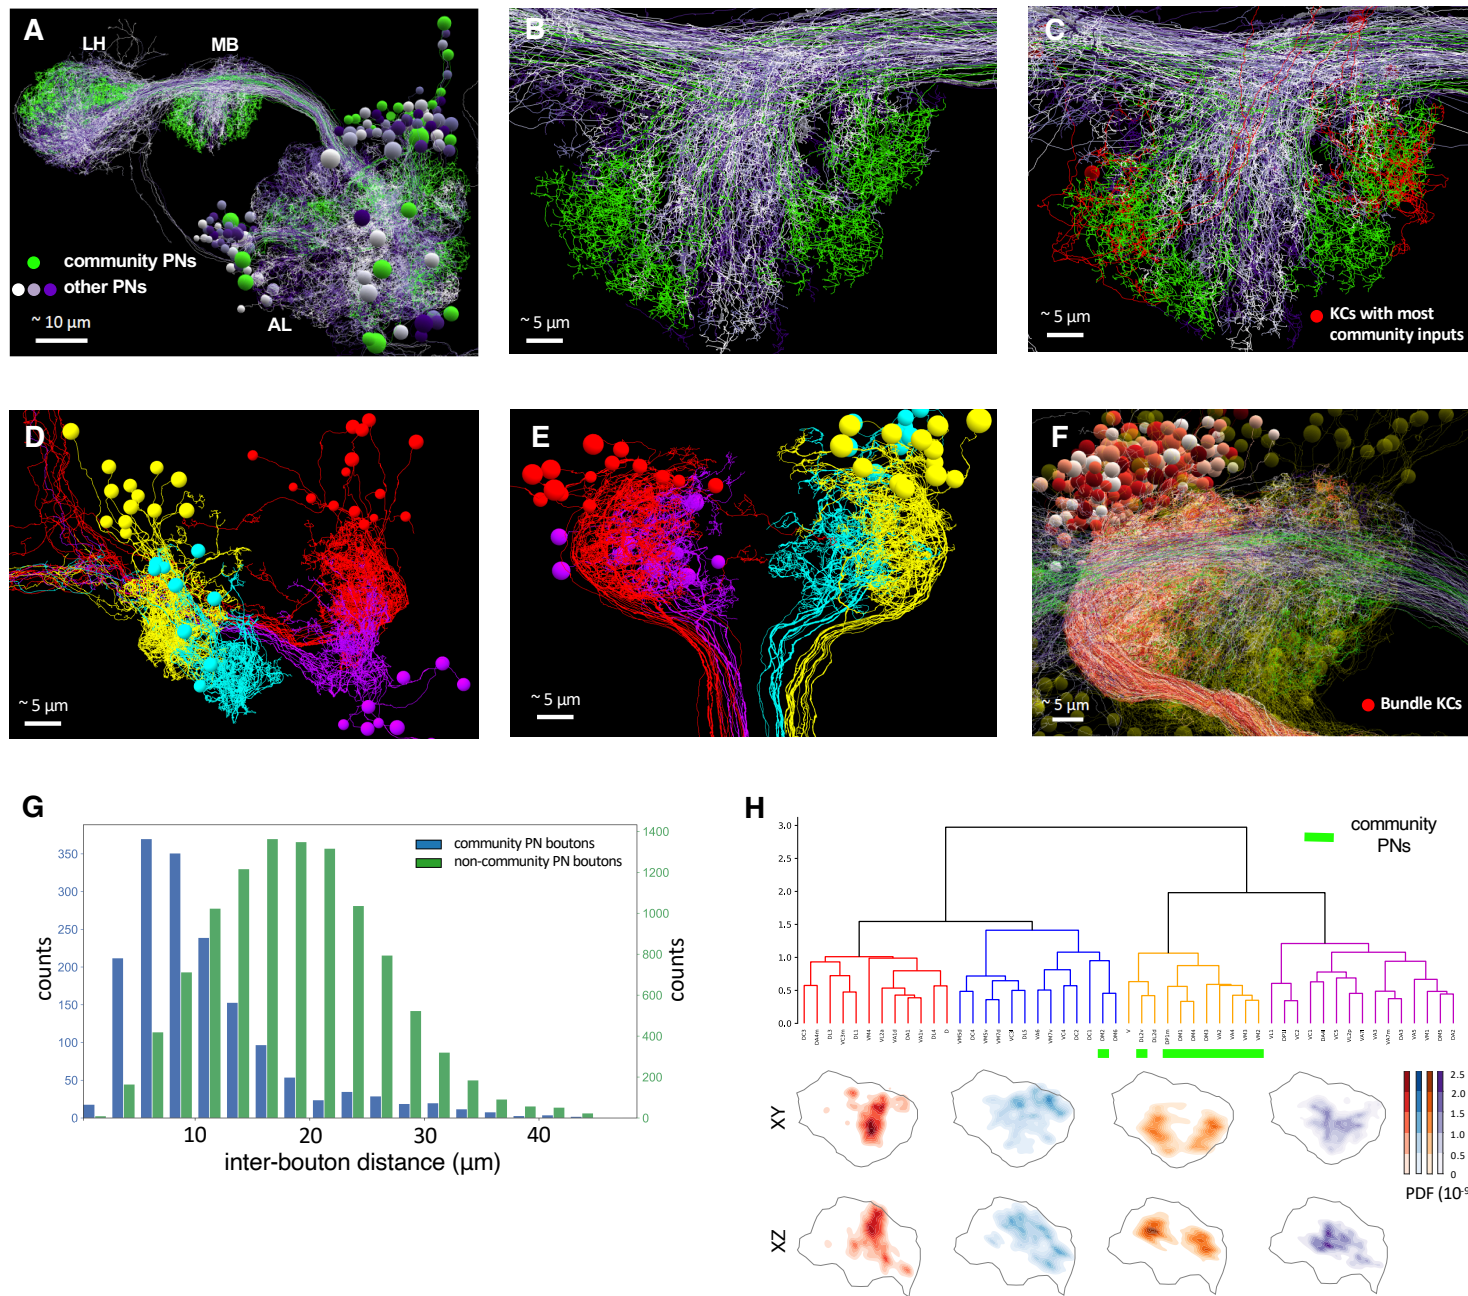



Supplemental Figure 1.

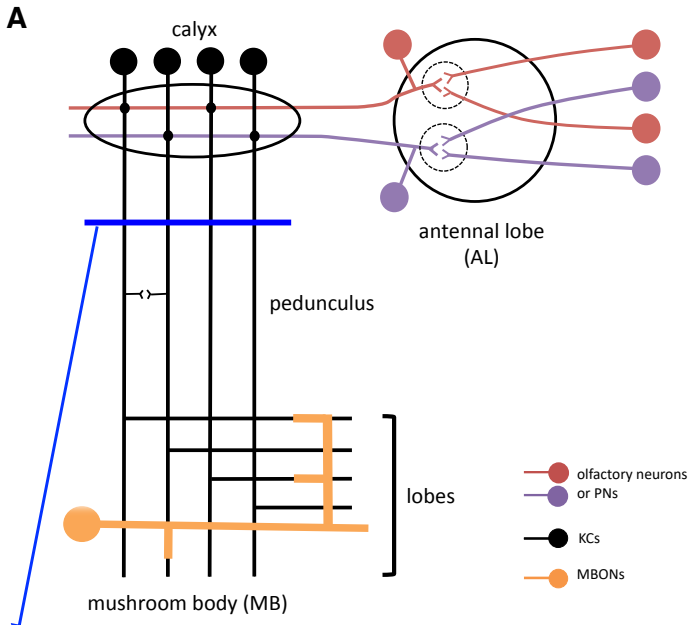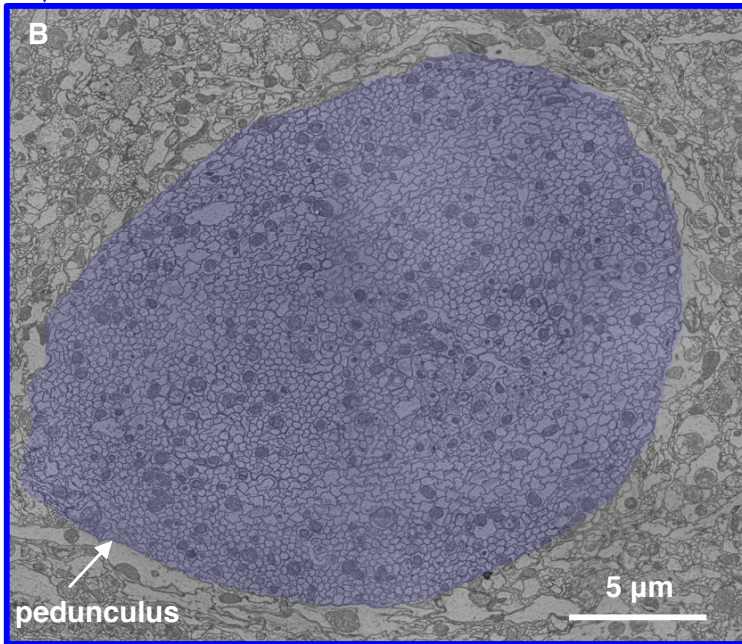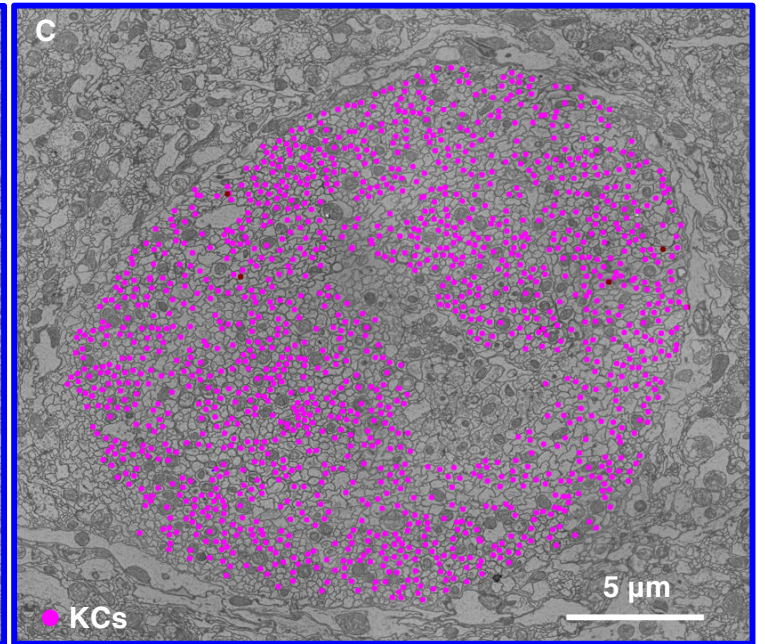

# Supplemental Figure 2.

**A**

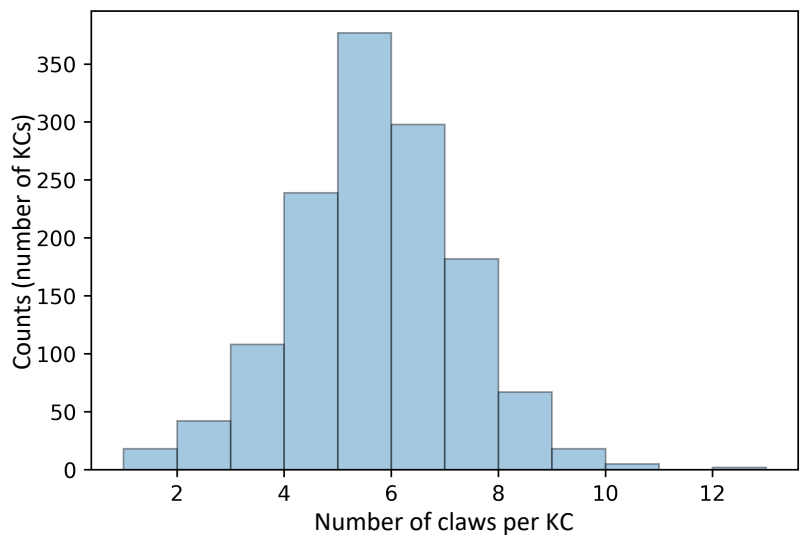

**B**

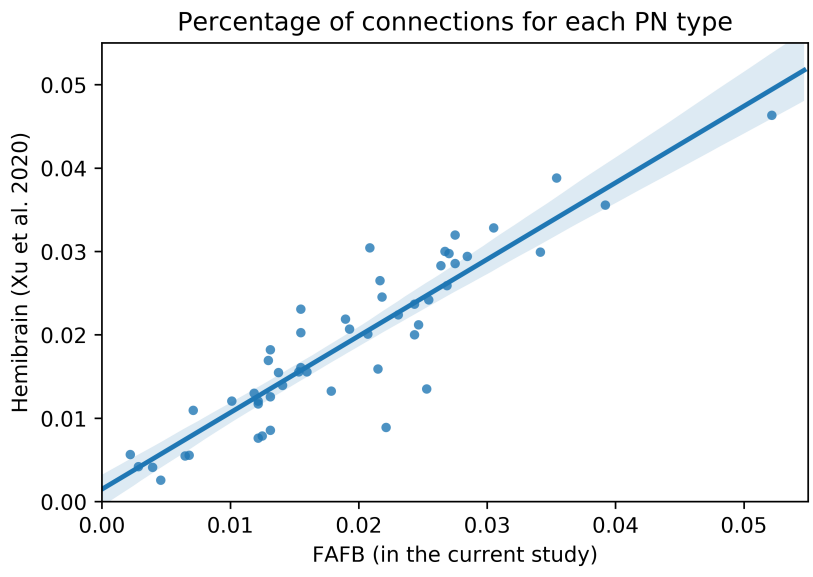

**C**

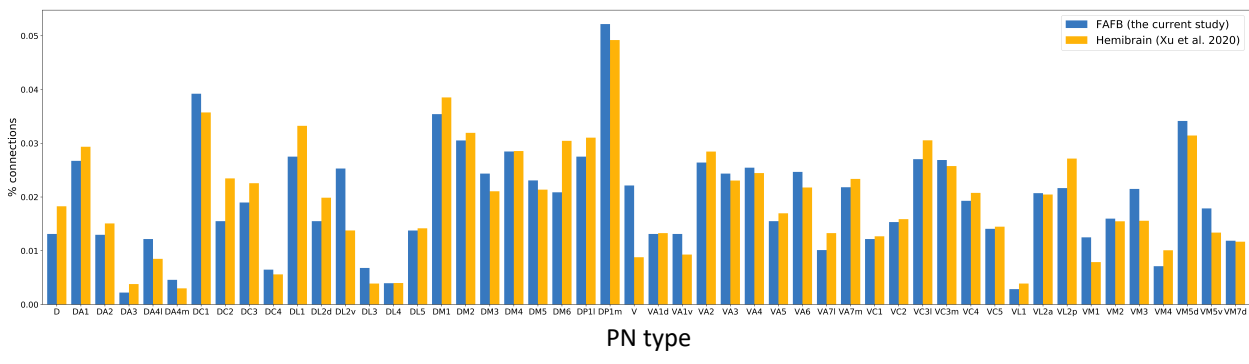

### Supplemental Figure 3.

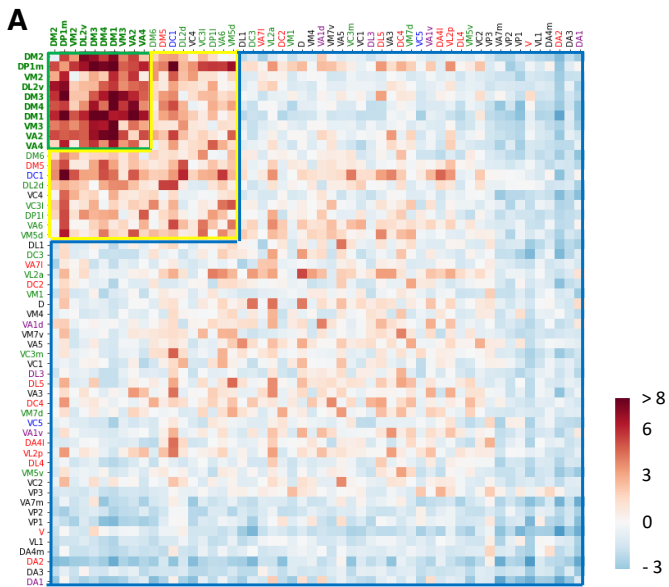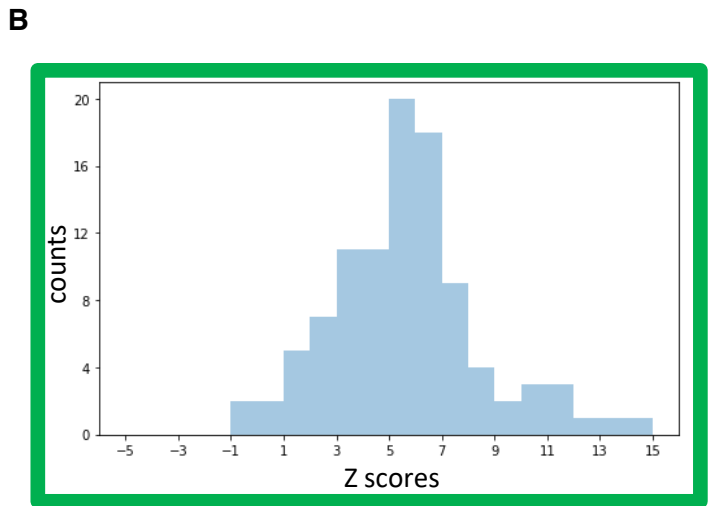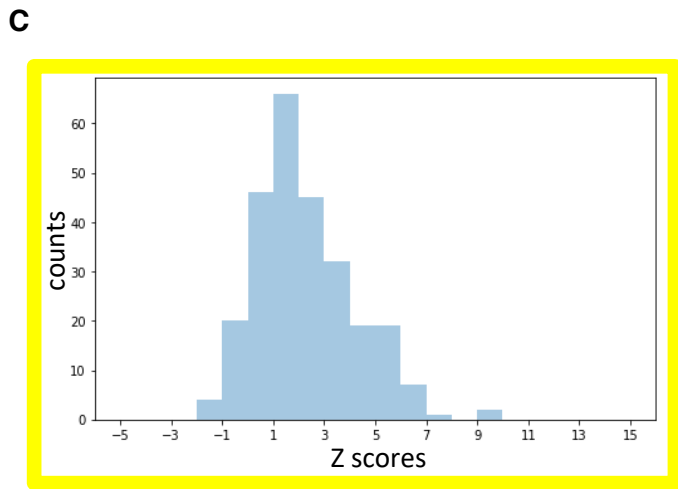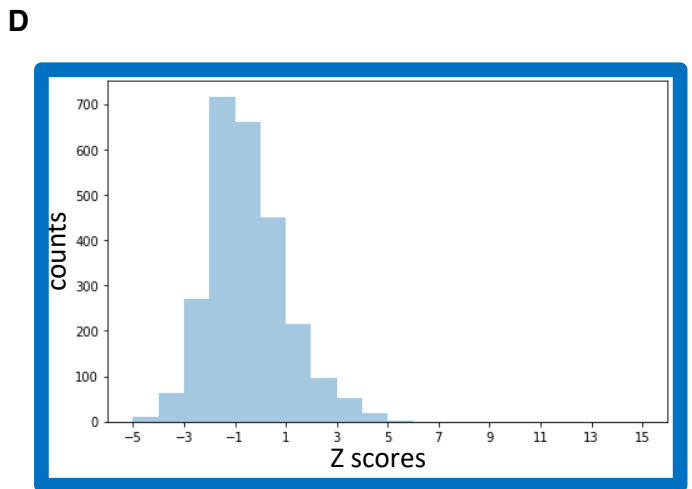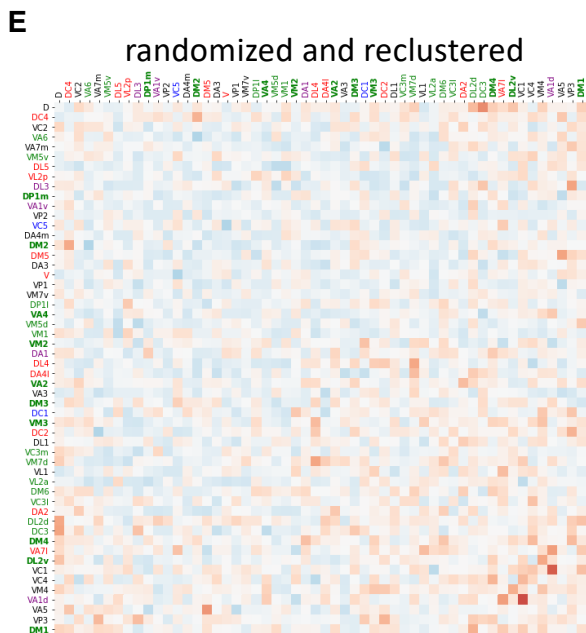

Supplemental Figure 4

Fig 1D clustering order

$P < 0.05$   
  $P \geq 0.05$

Bouton-claw  
connection  
counts

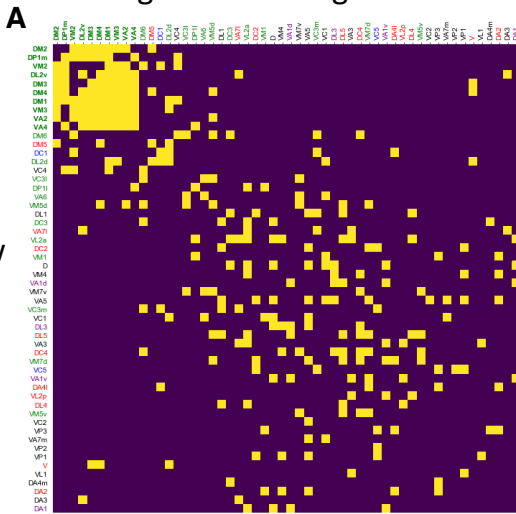

Synapse  
counts

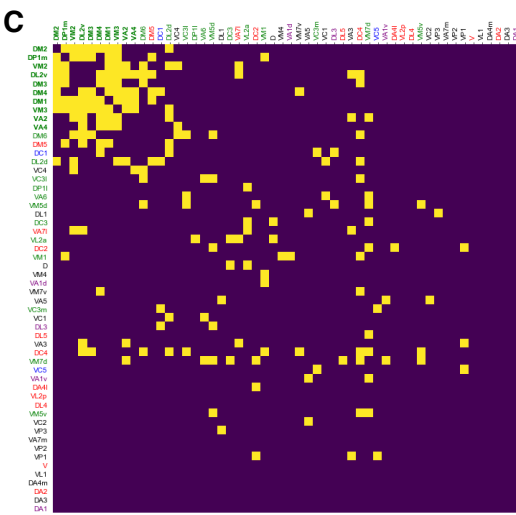

Re-cluster

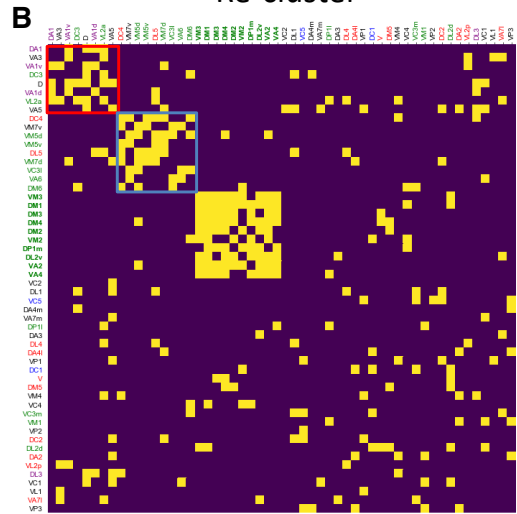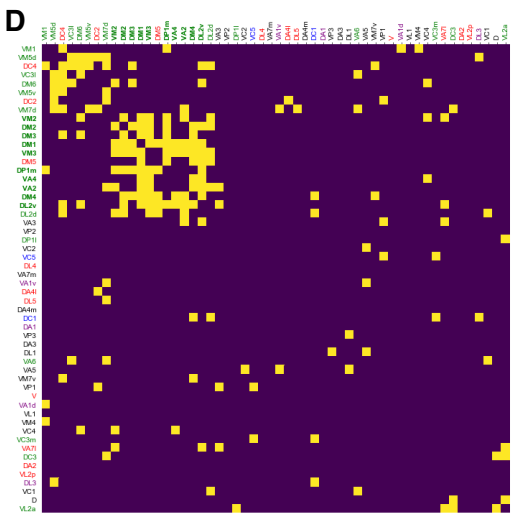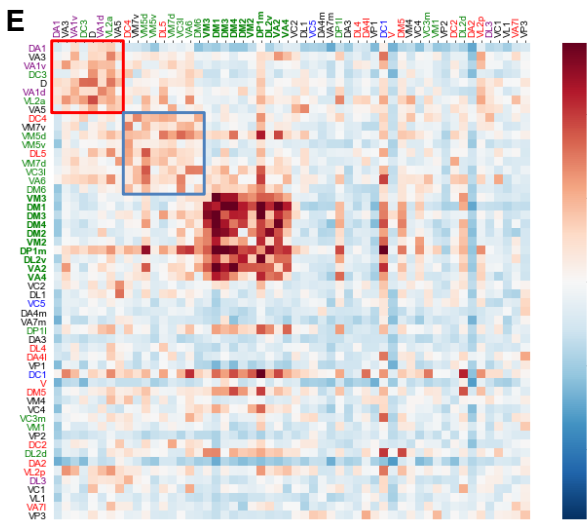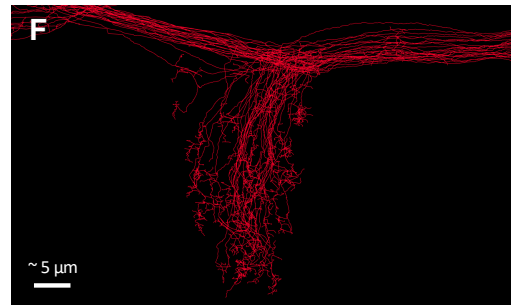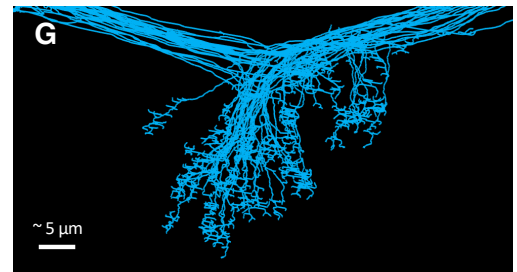

Supplemental Figure 5.

**A**

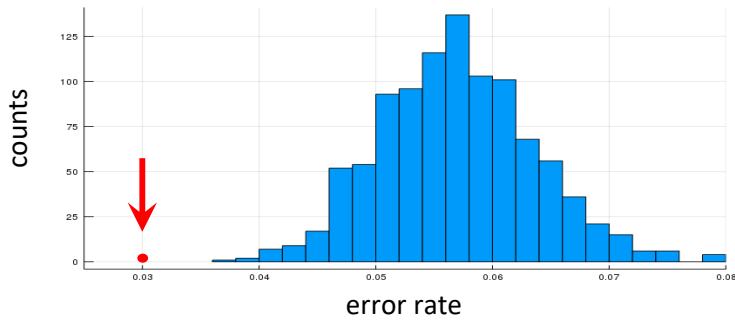

**B**

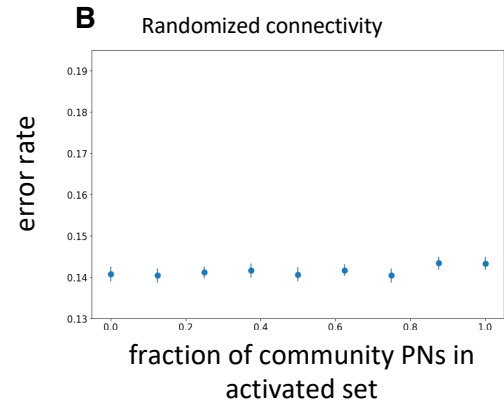

## Supplemental Figure 6. Random claw model

**A** random claw model, randomized and reclustered

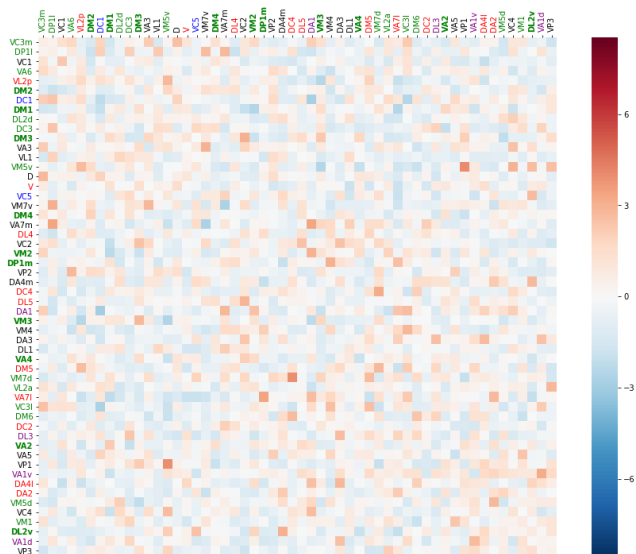

**B** random claw vs. random bouton models: z-score distribution

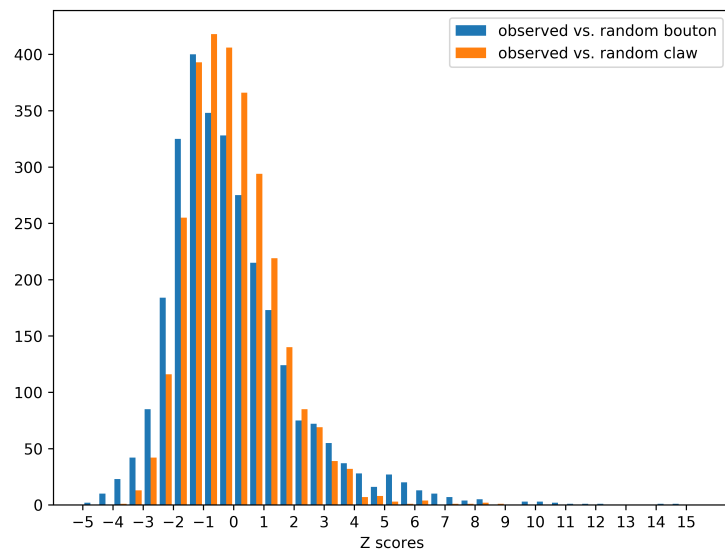

Supplemental Figure 7.

**A** Caron et al. data (random bouton null model)

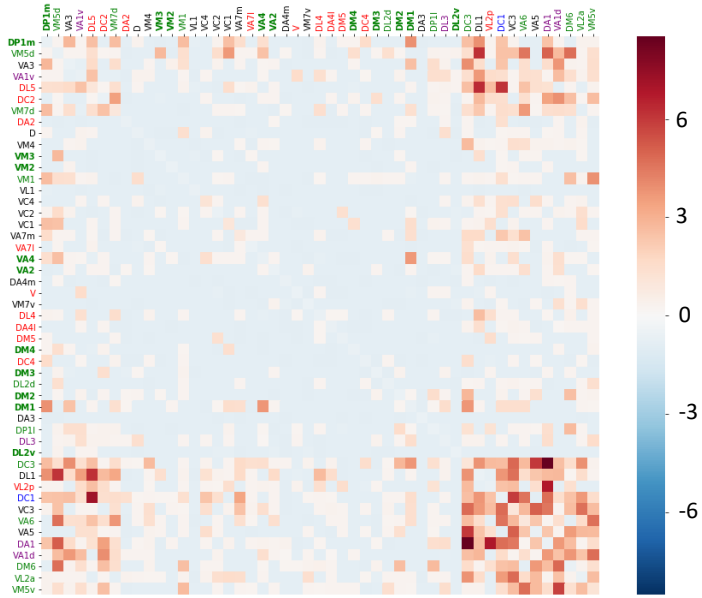

**B**

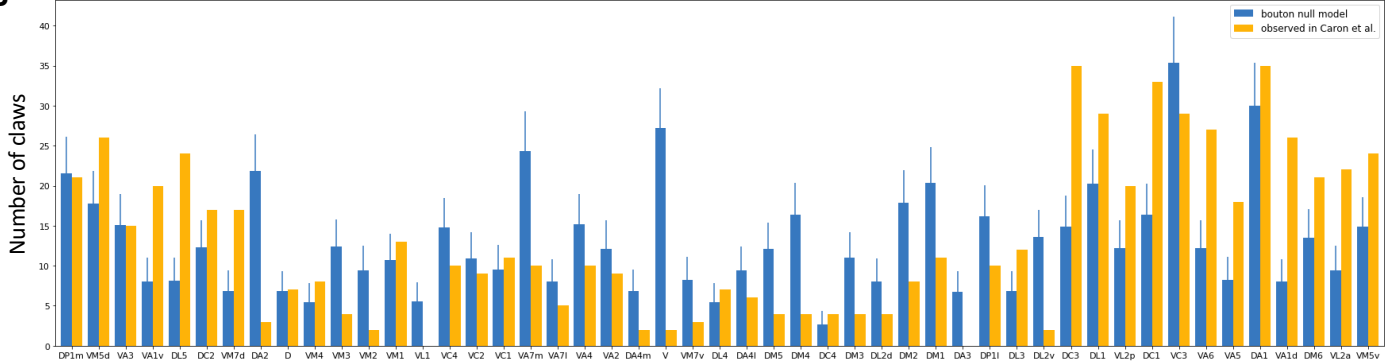

**C**

Caron et al. data (random claw null model)

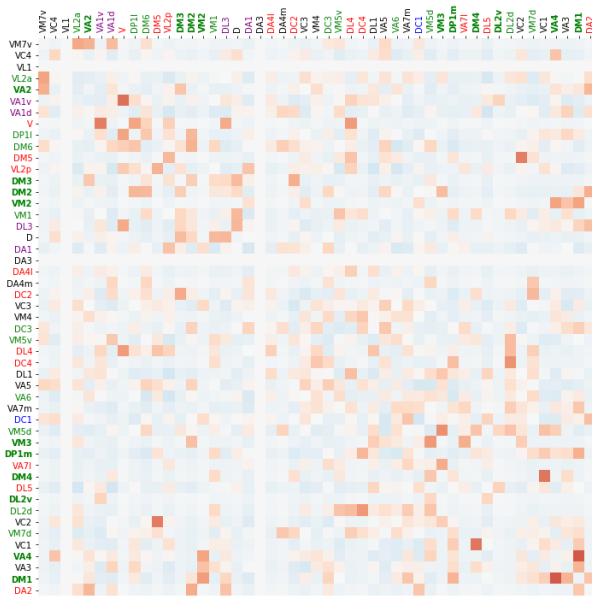

**D**

Subsampling of data from current study, with Caron et al. sample size (random bouton null model)

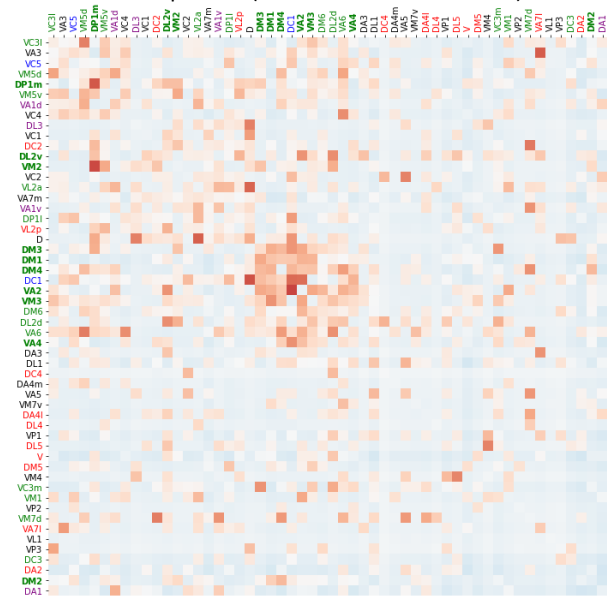

Supplemental Figure 8.

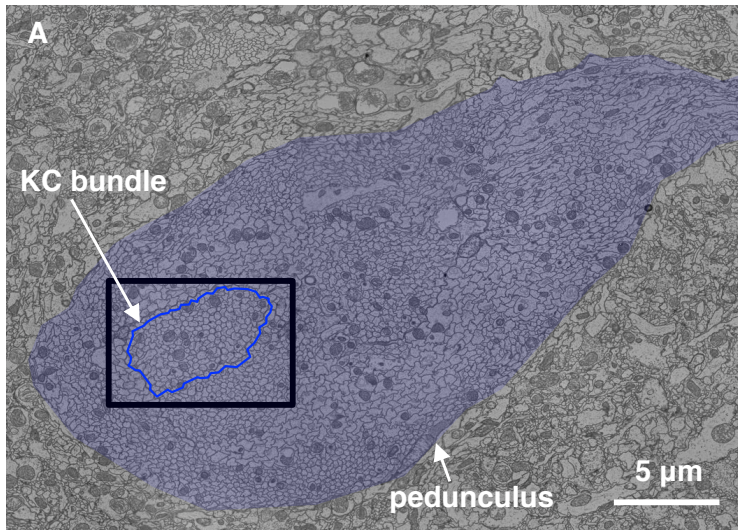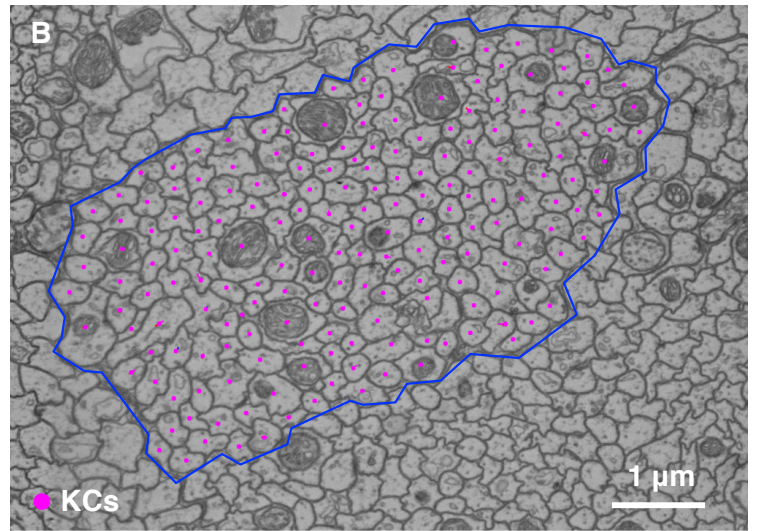



Supplemental Figure 9.

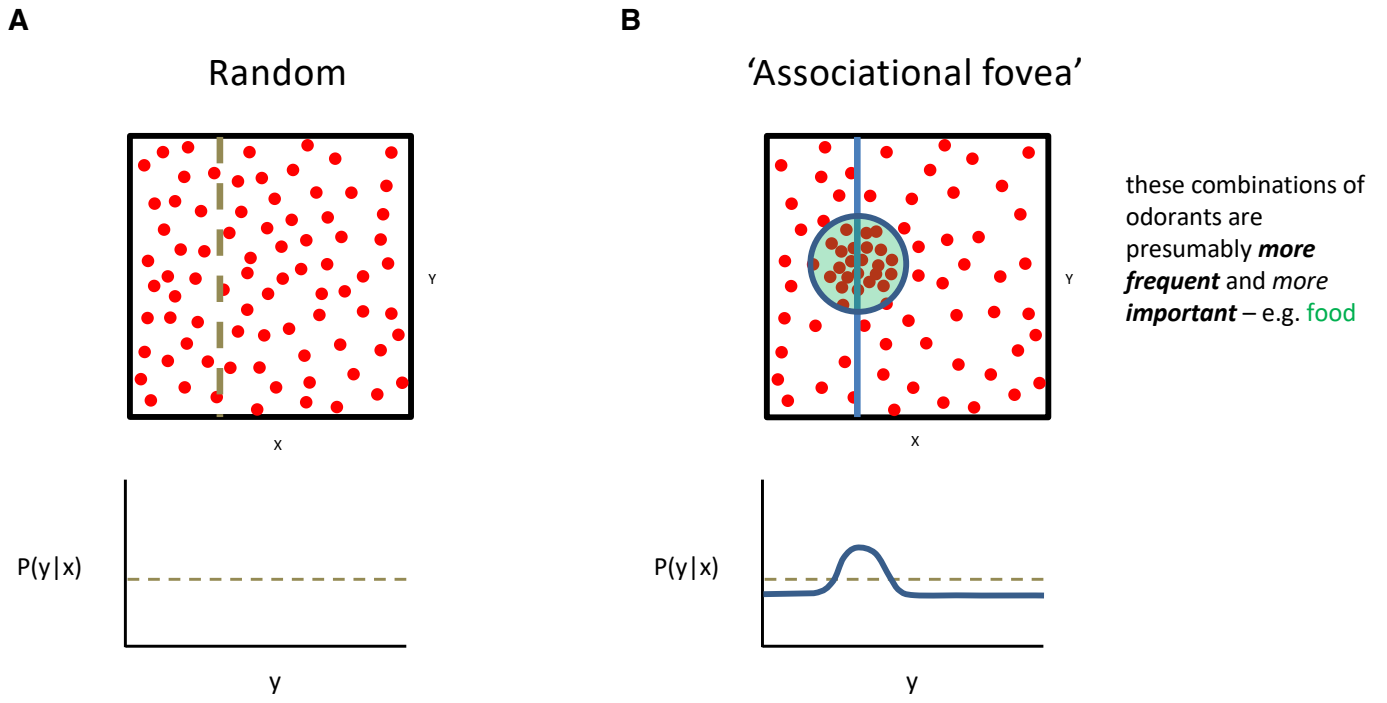

Source: https://www.biorxiv.org/content/10.1101/2020.04.17.047167v2.full.pdf
